# Supplementary material for: Estimates of the global burden of Japanese encephalitis and the impact of vaccination from 2000-2015
Source: eLife journal article supplement (doi:10.7554/elife.51027), 2020-05-25

# Bangkok and Hat Yai Thailand

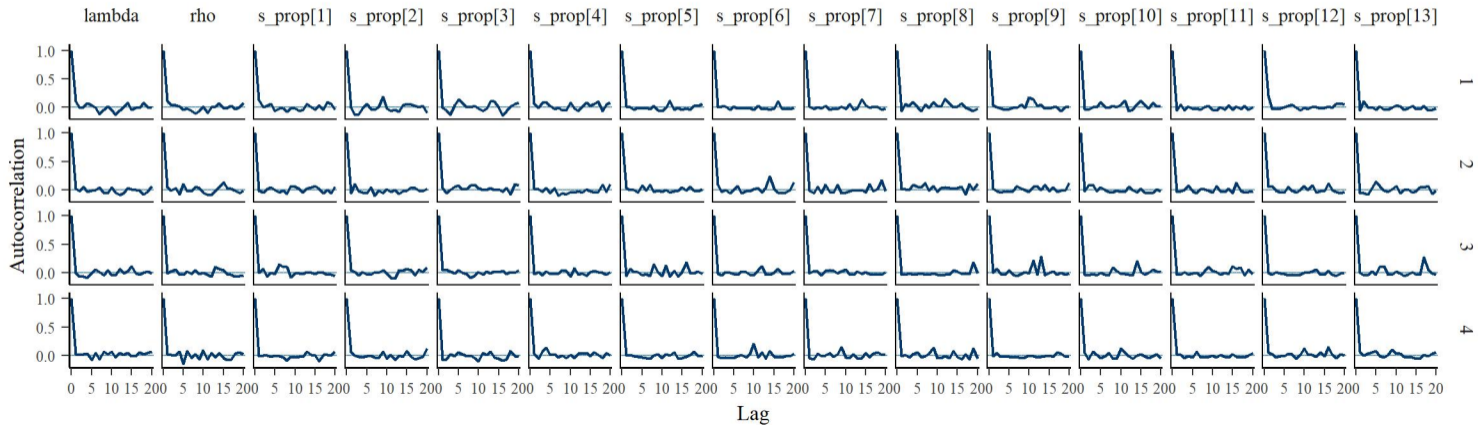

# 4 division Bangladesh

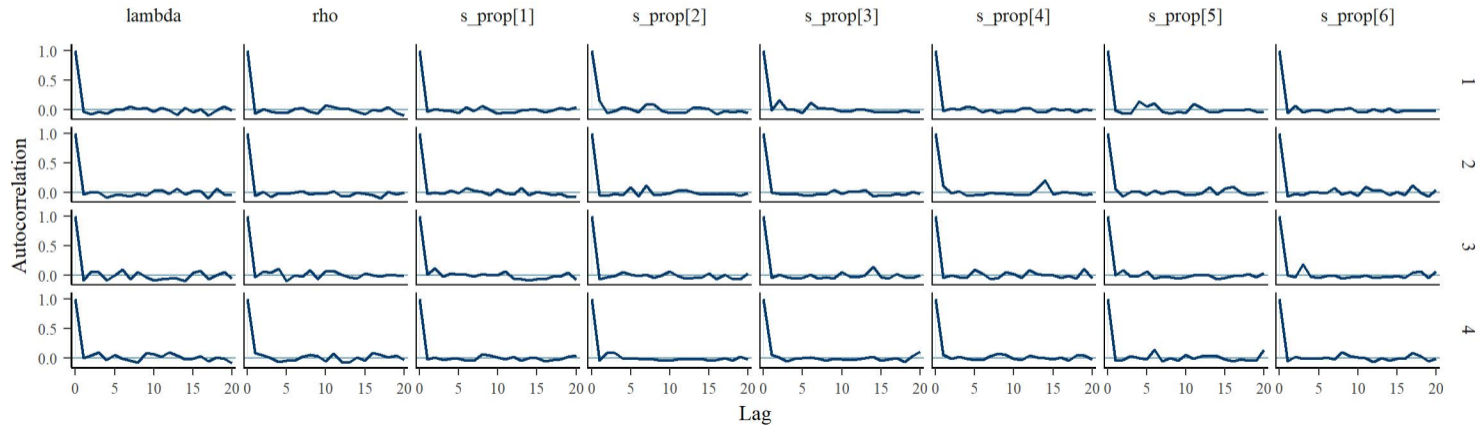

5 northern provinces  
Vietnam

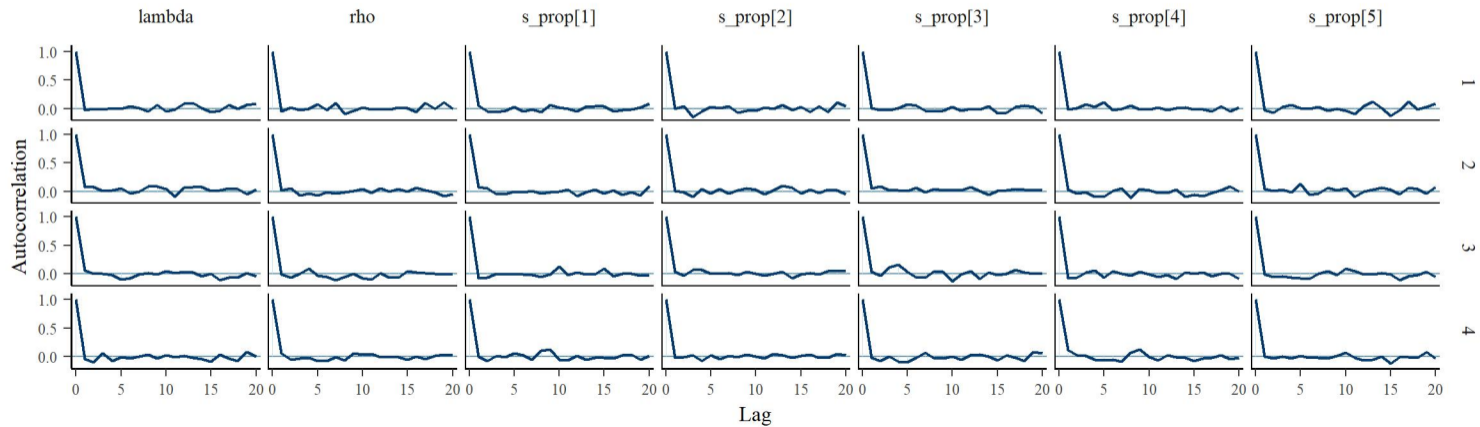

6 provinces  
Low and High Indonesia

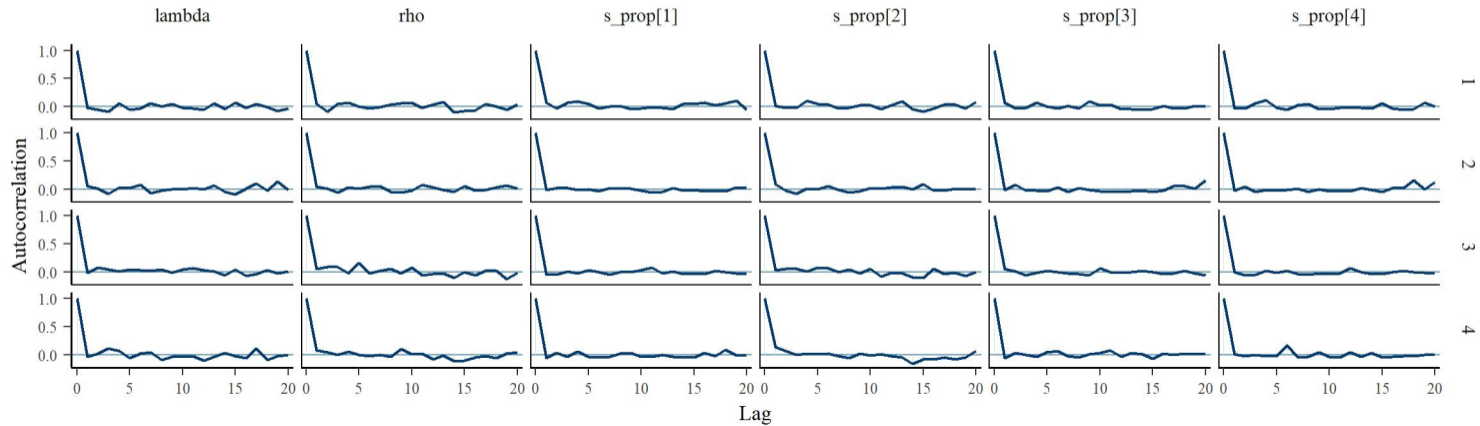

13 southern provinces  
Vietnam

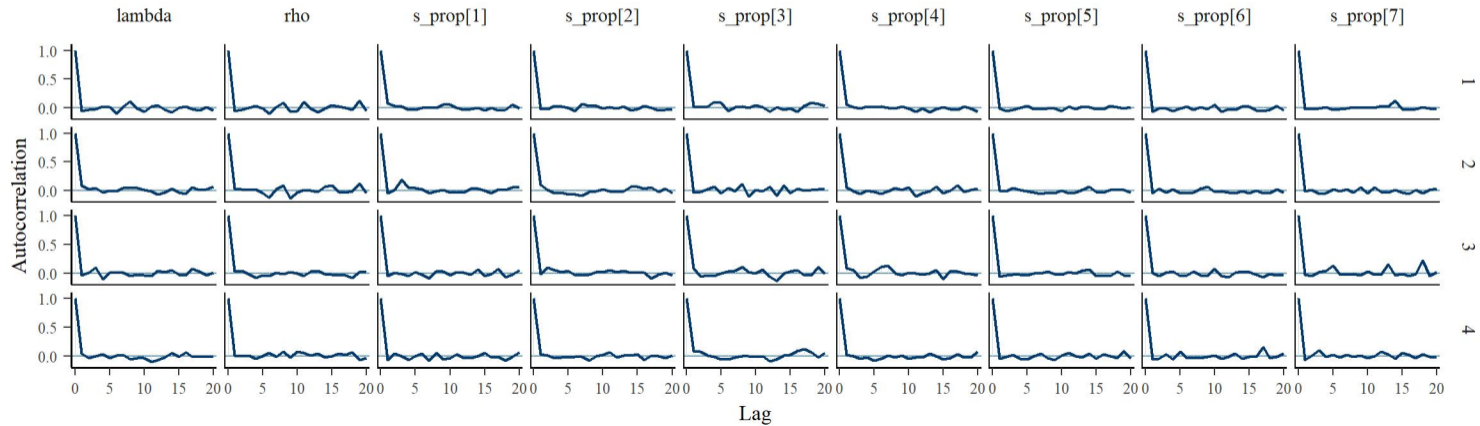

Assam  
Medium India

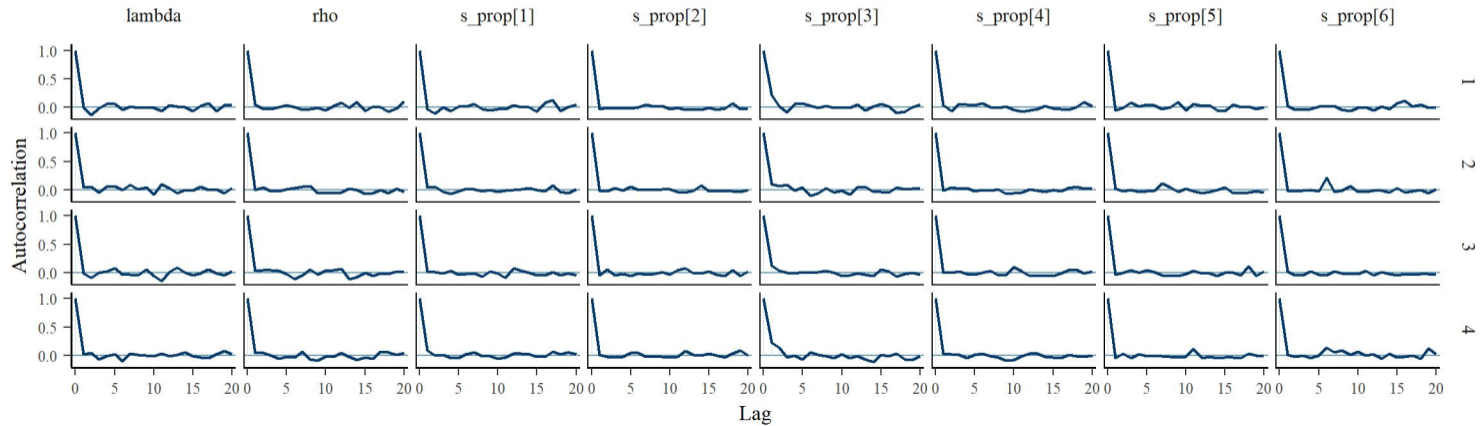

# Bali

## Low and High Indonesia

lambda

rho

s\_prop[1]

s\_prop[2]

s\_prop[3]

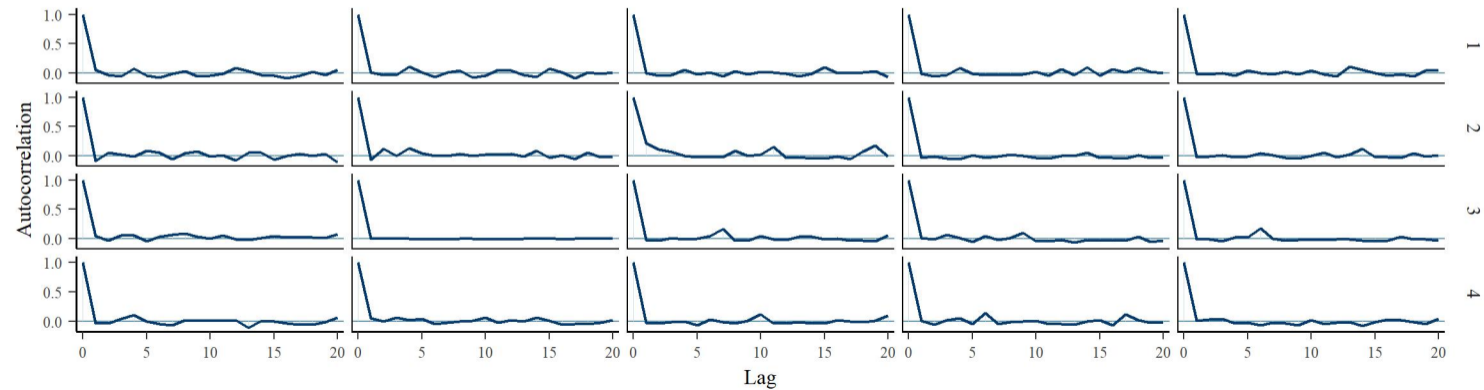

# Baoji High China

lambda

rho

s\_prop[1]

s\_prop[2]

s\_prop[3]

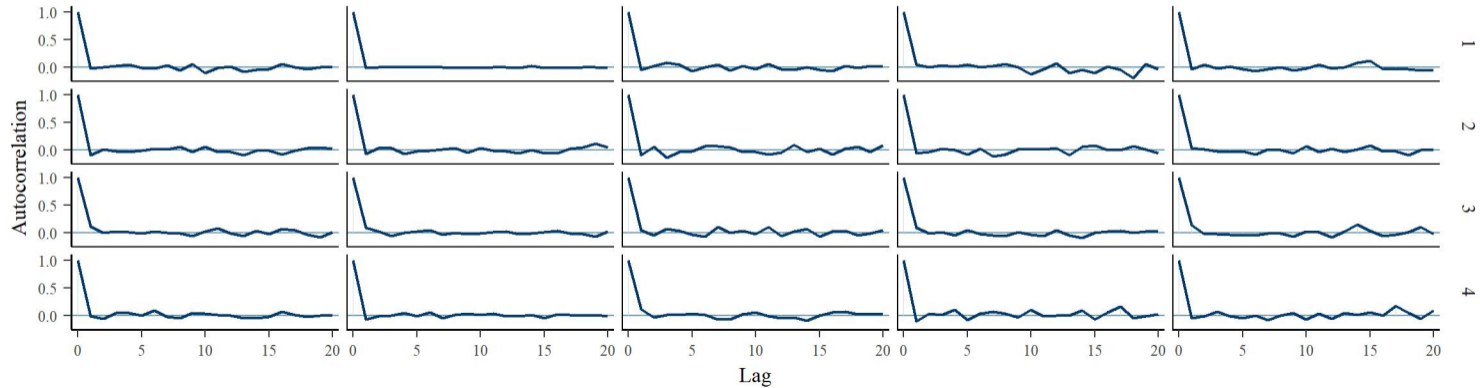





Bellary  
Medium India

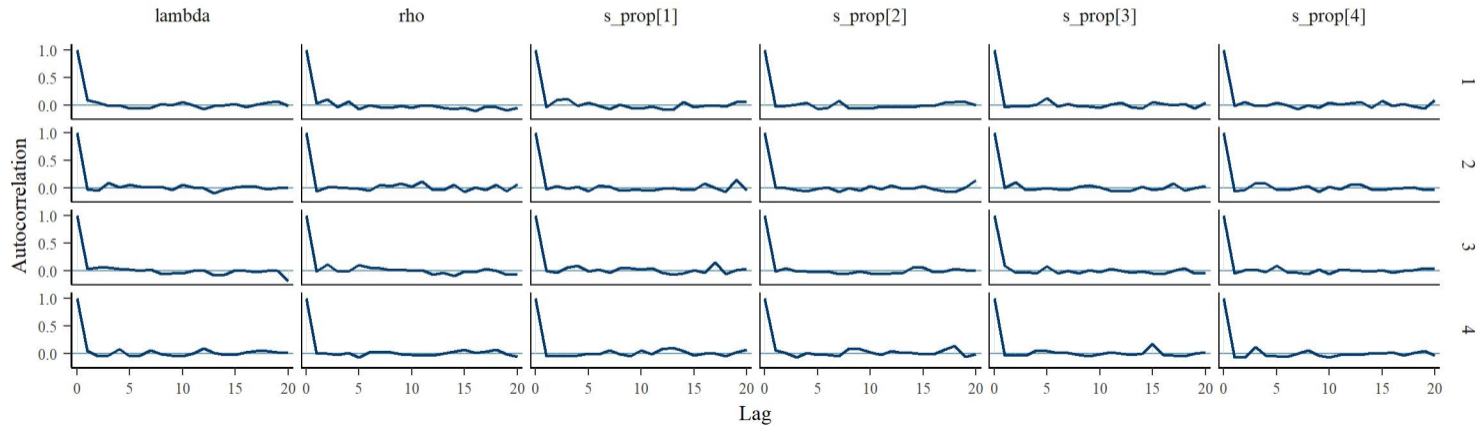

Nation  
Cambodia

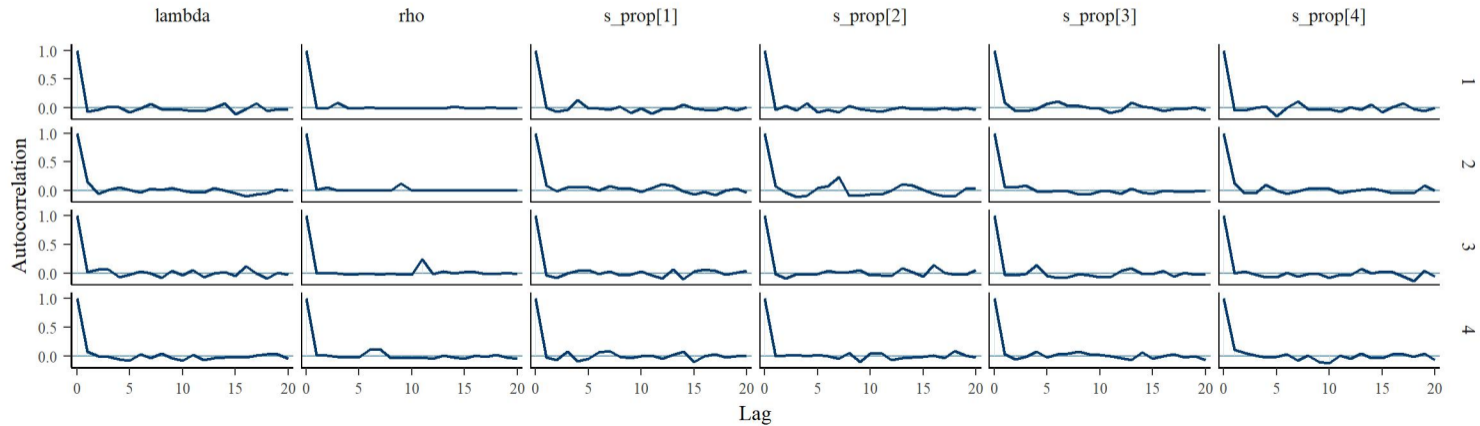

Central  
Taiwan

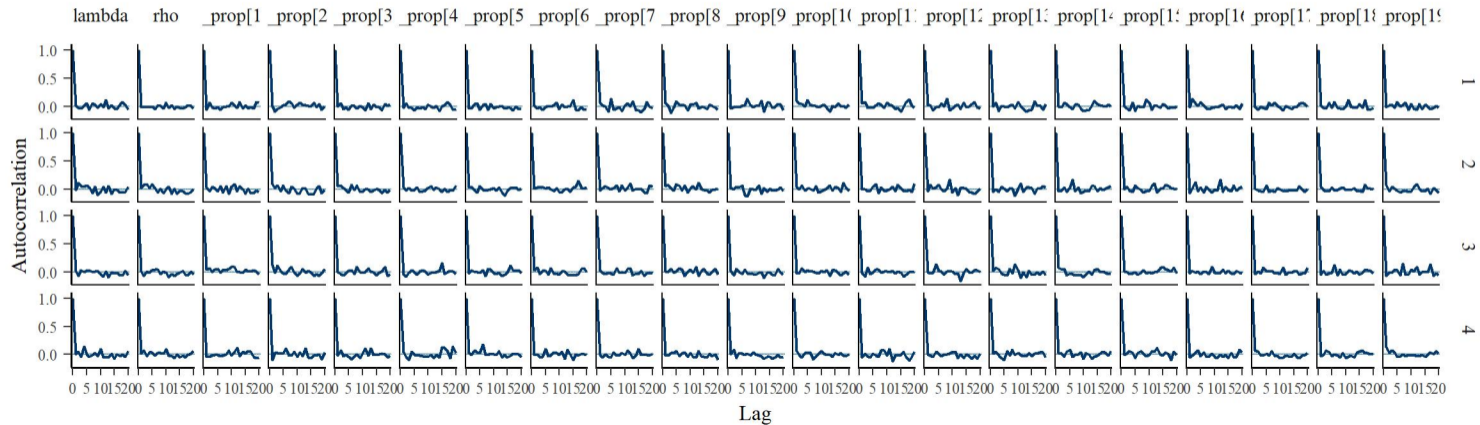

# Cuddalore Medium India

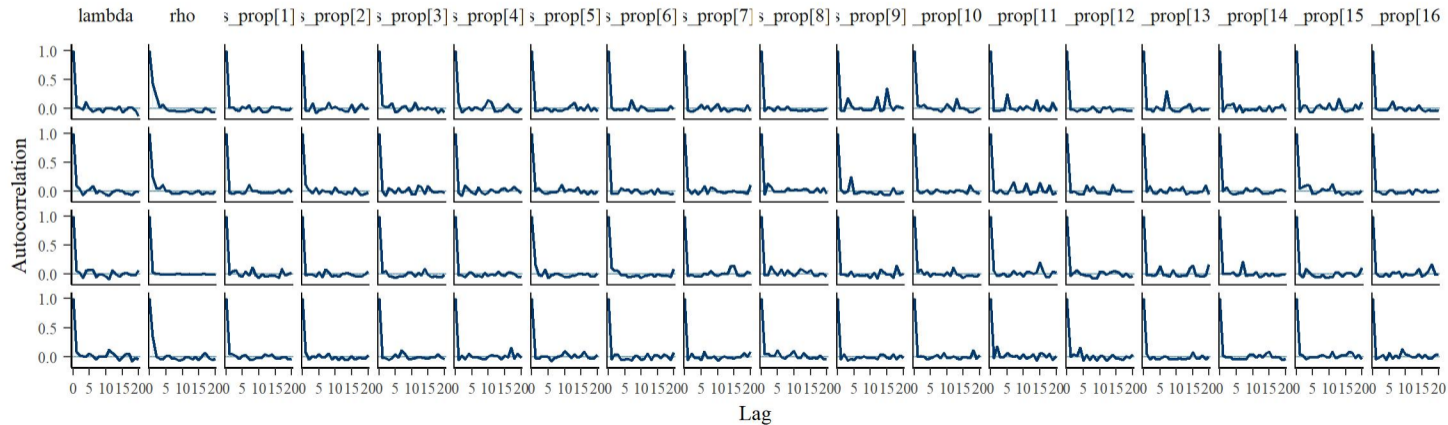



Eastern  
Taiwan

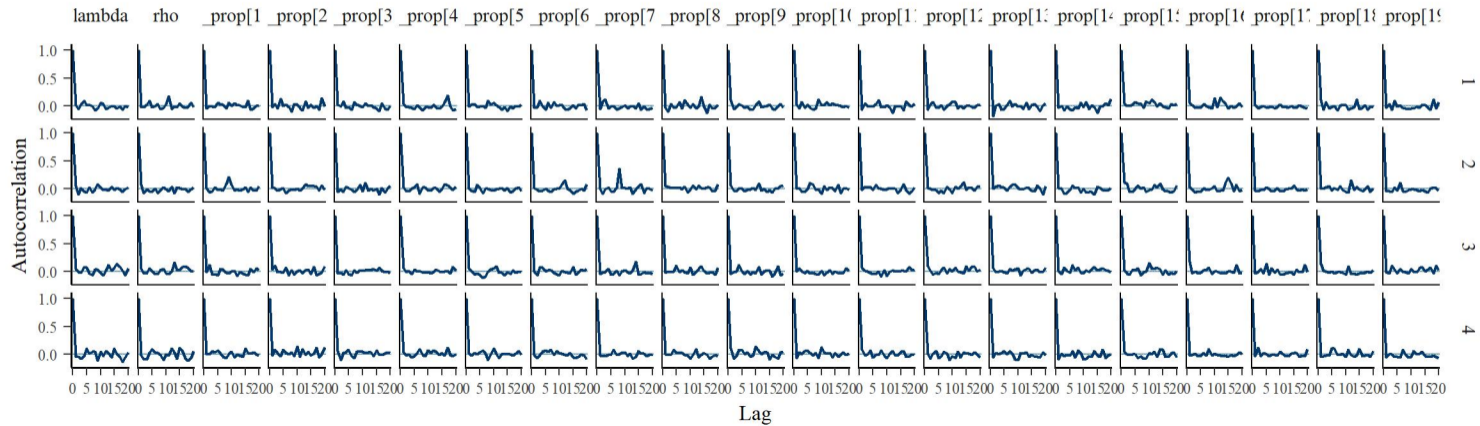

# Gorakhpur district High India

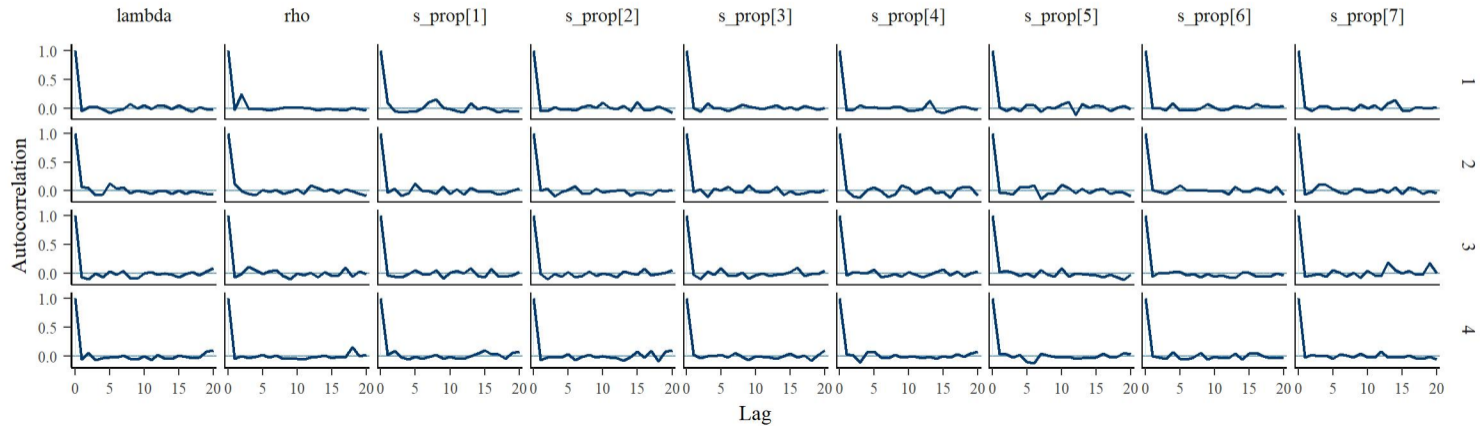





# Guigang High China

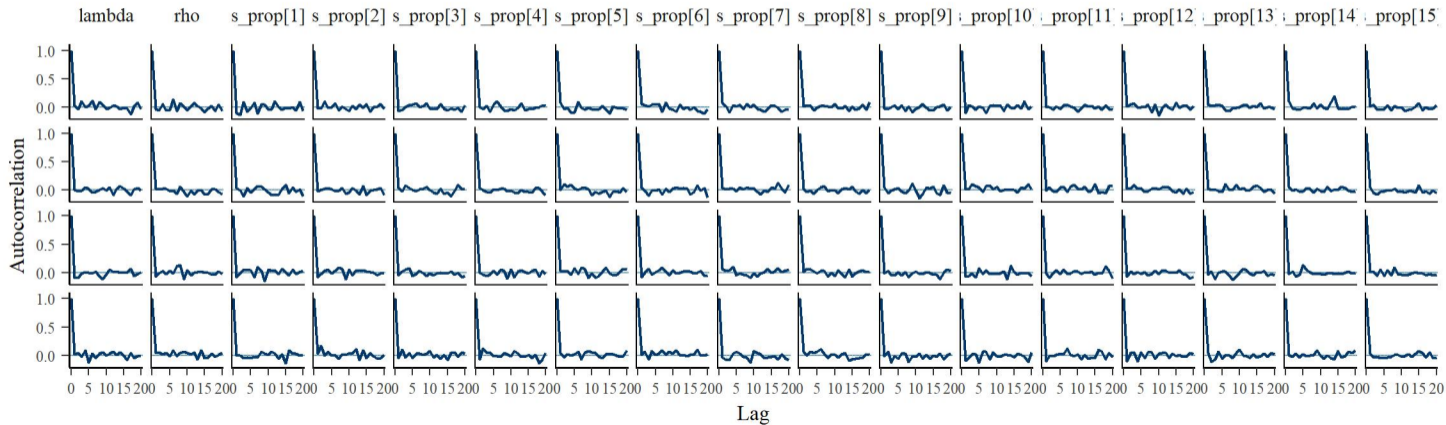

# Guizhou High China

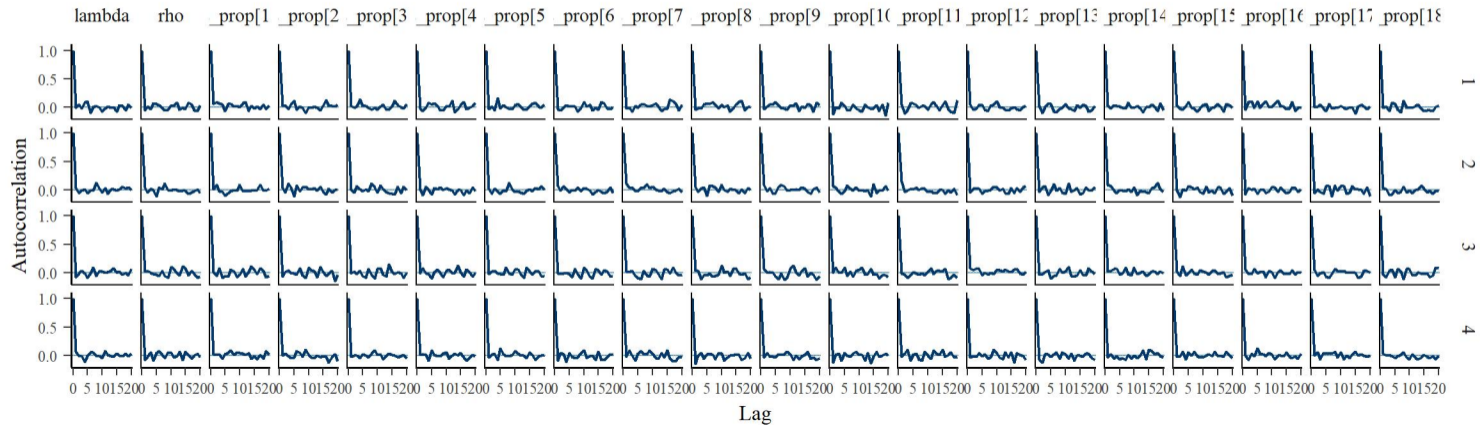

Shijiazhuang  
Low China

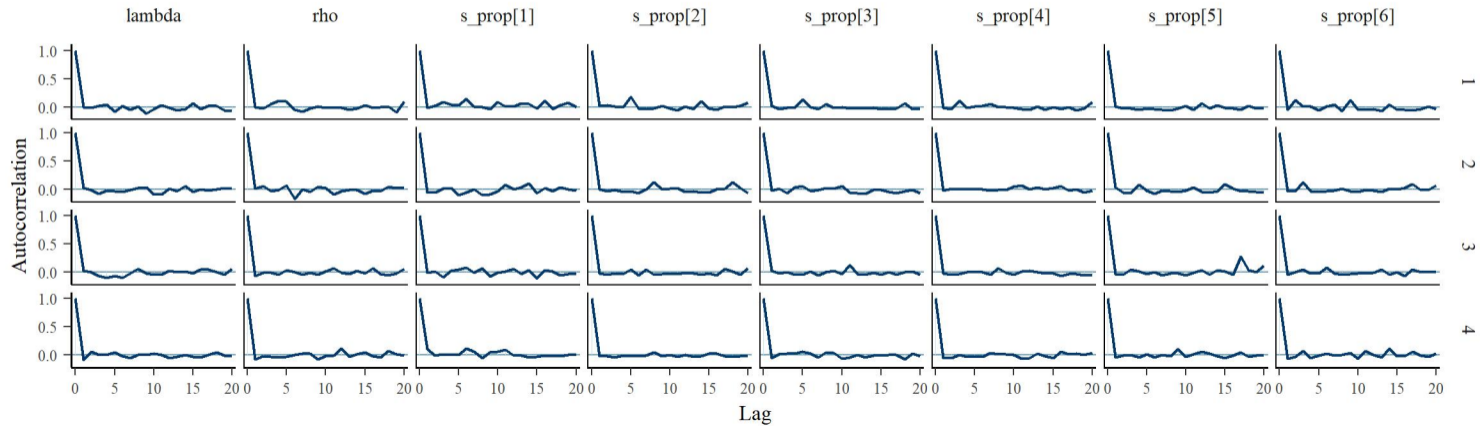

# Yichang High China

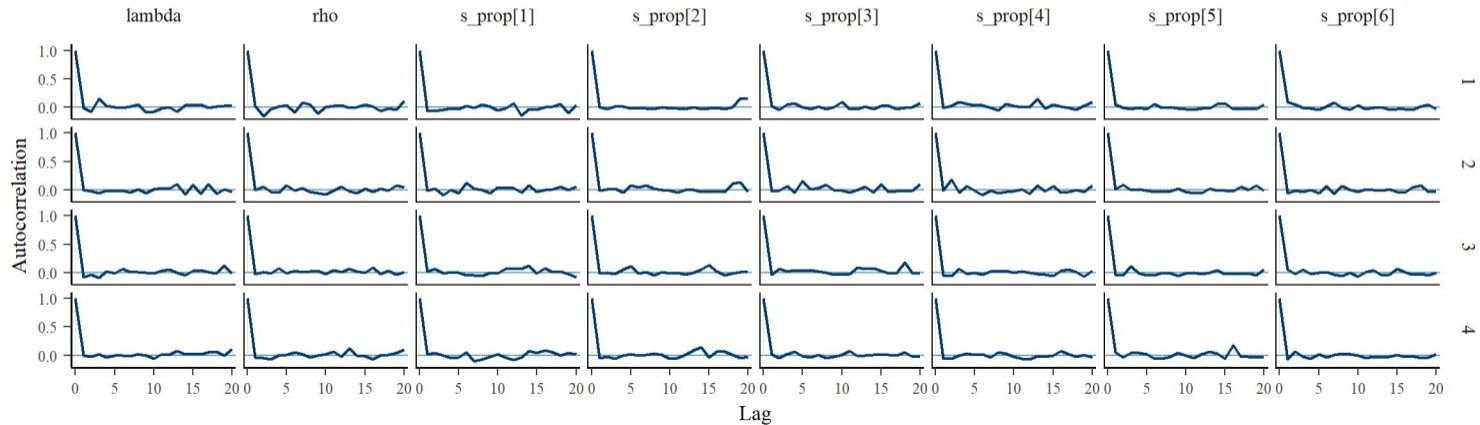

Nation  
India

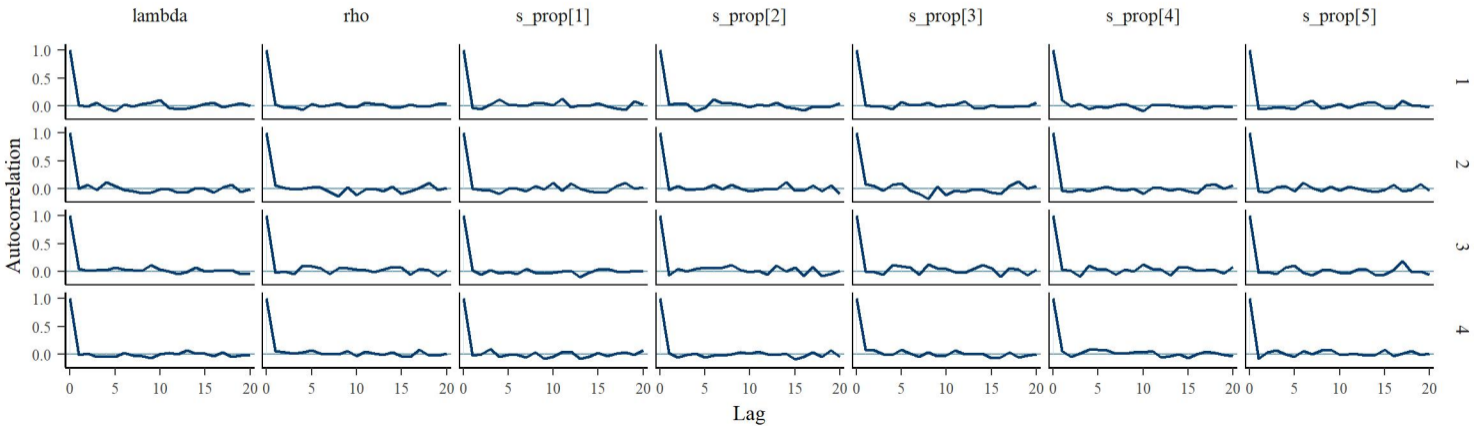



Kaoping  
Taiwan

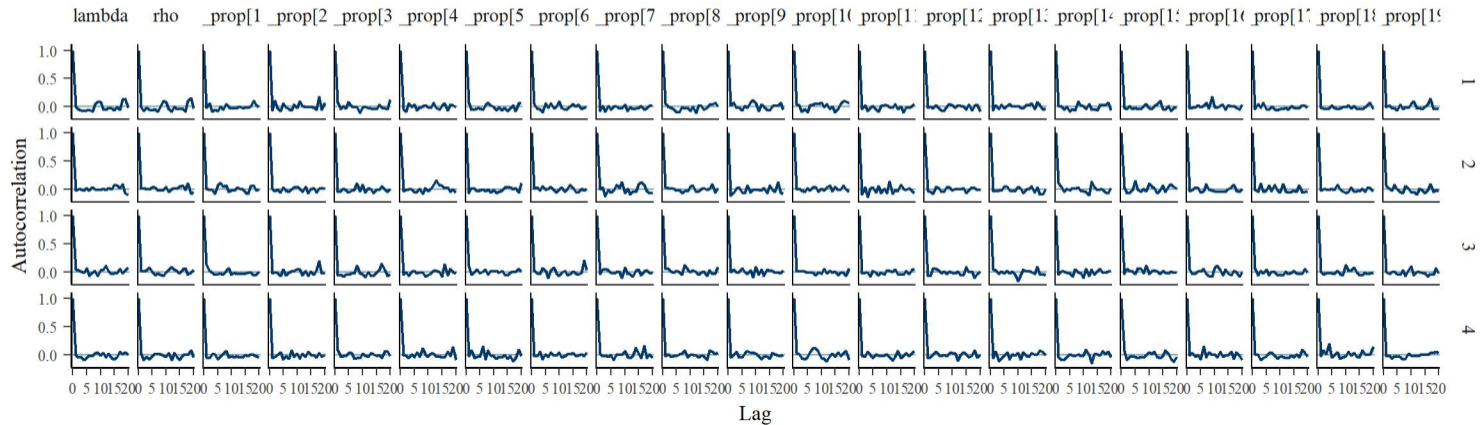



# Kathmandu districts

## Low Nepal

lambda

rho

s\_prop[1]

s\_prop[2]

s\_prop[3]

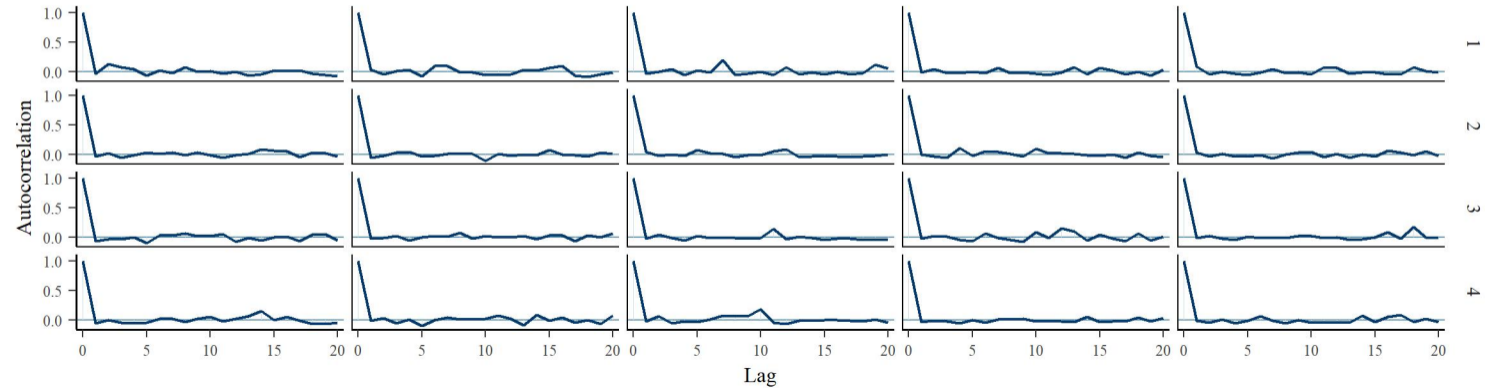

# Longnan High China

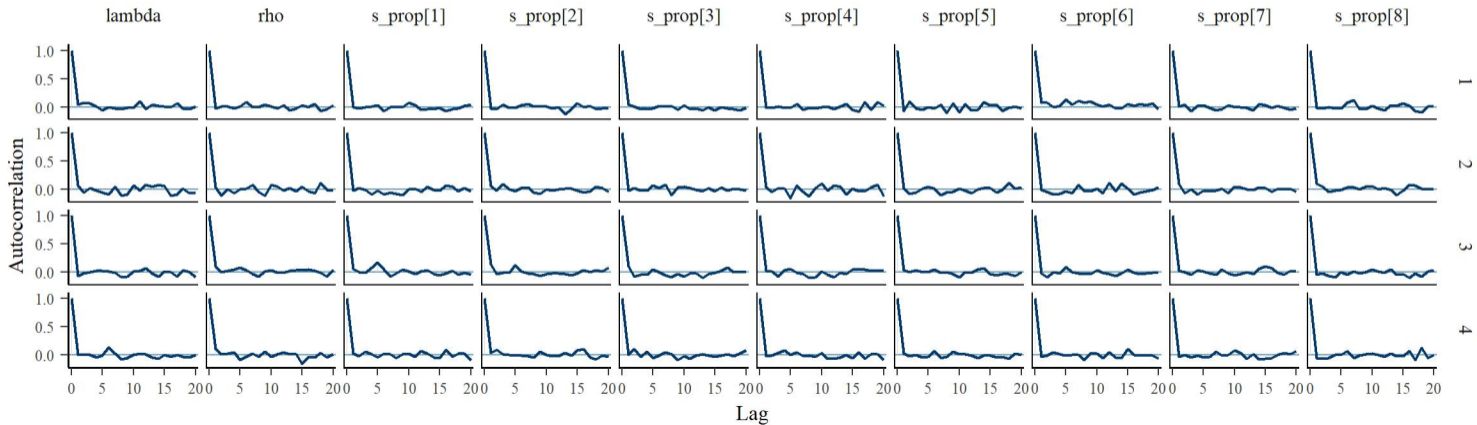

Nation  
Malaysia

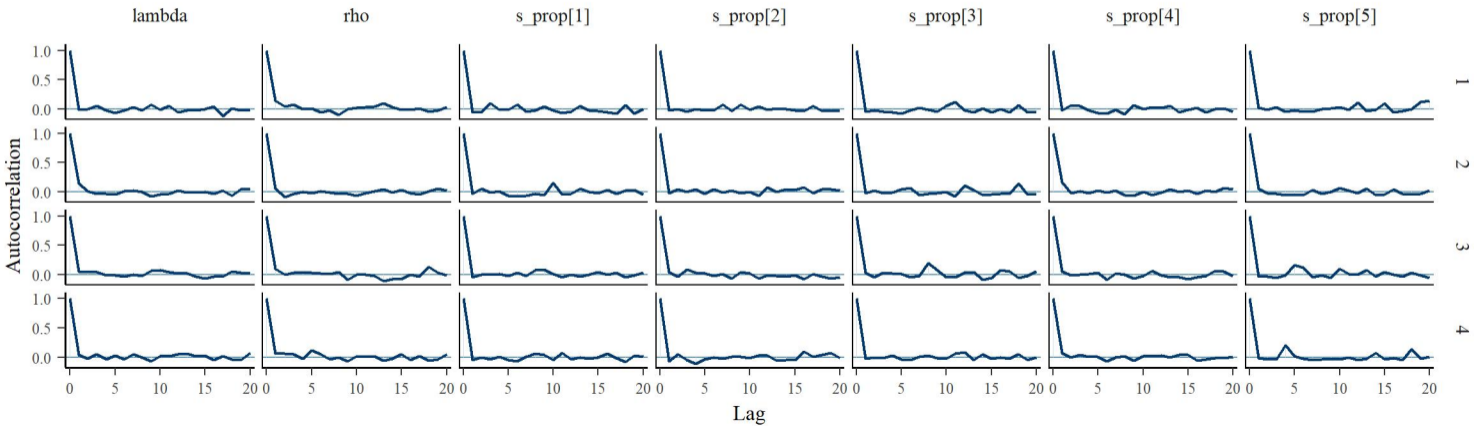

Nation  
Nepal

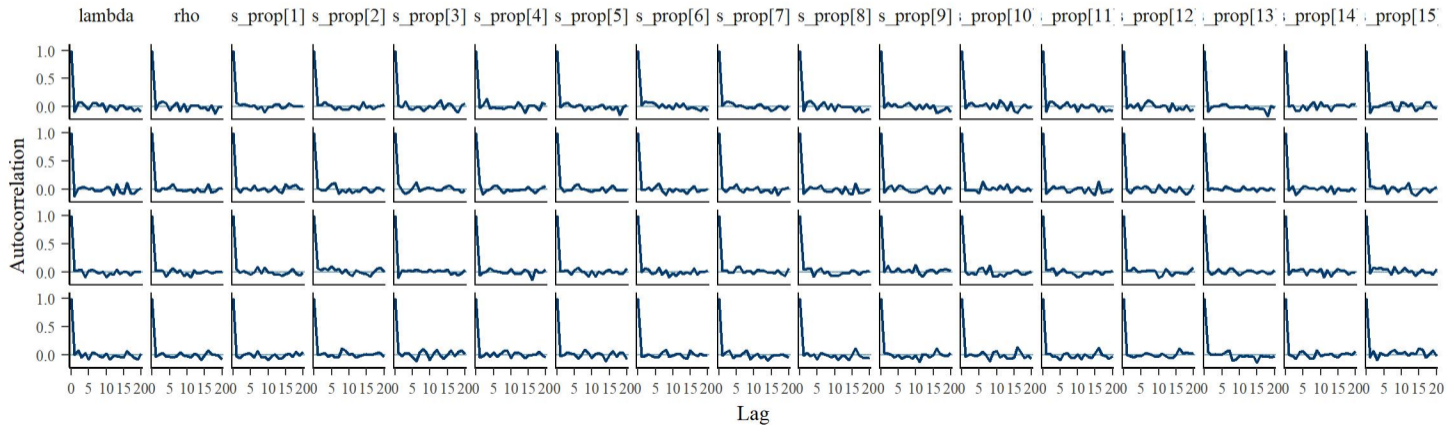

# Endemic provinces Low and High China

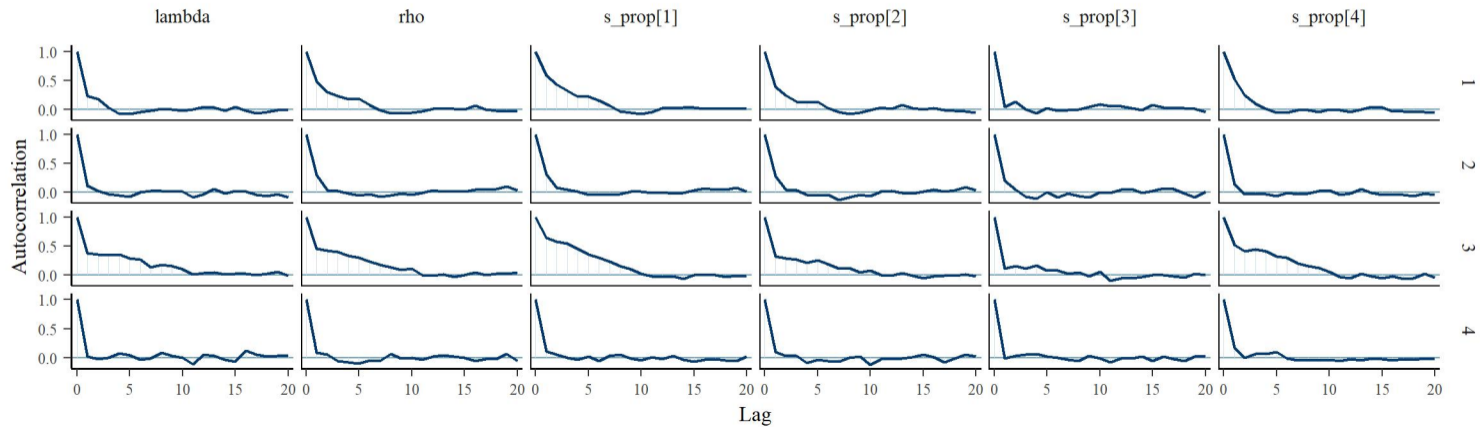

# Hill and mountain districts Low Nepal

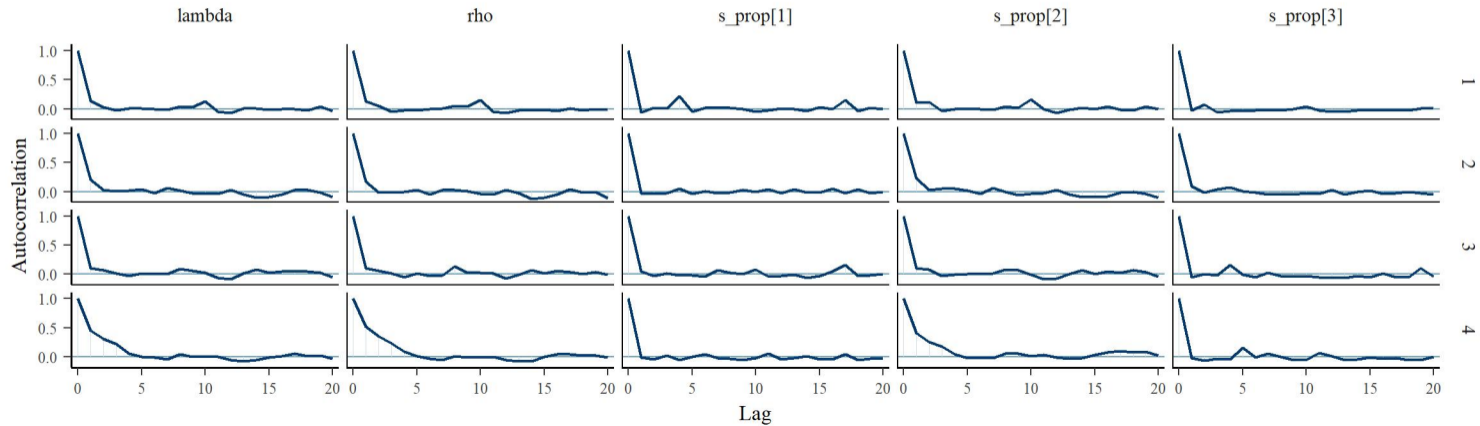

Not western Terai  
Low Nepal

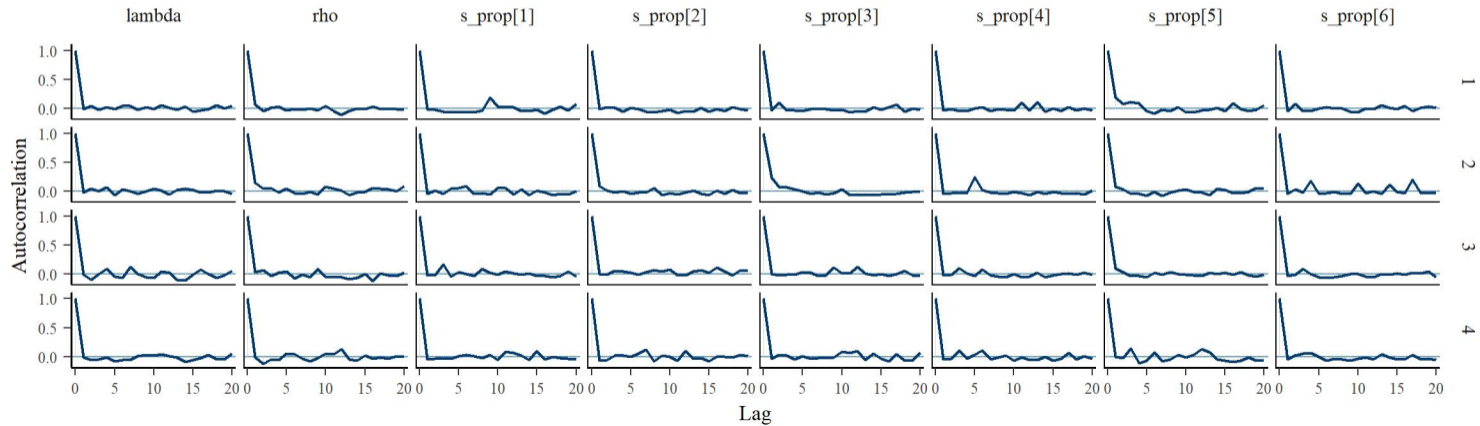

# Nothern of Uttar Pradesh High India

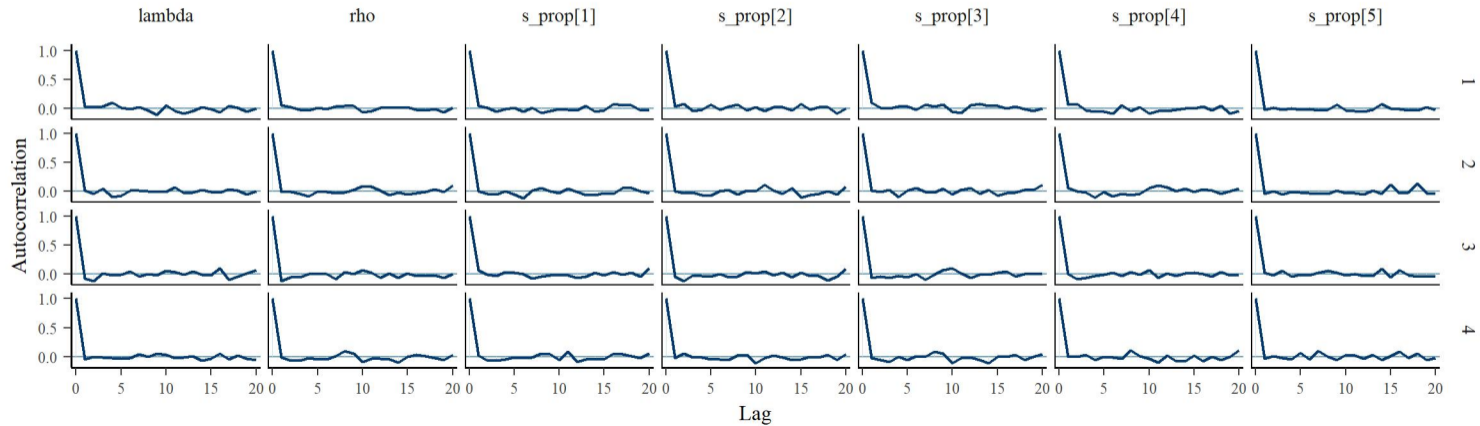



# Northern Taiwan

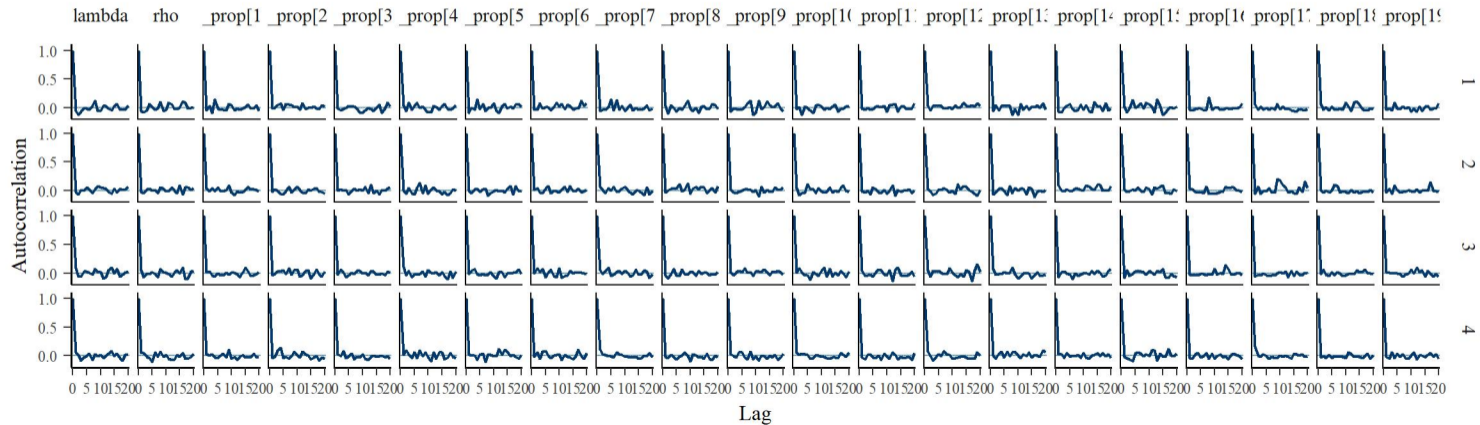

Nation  
Philippines

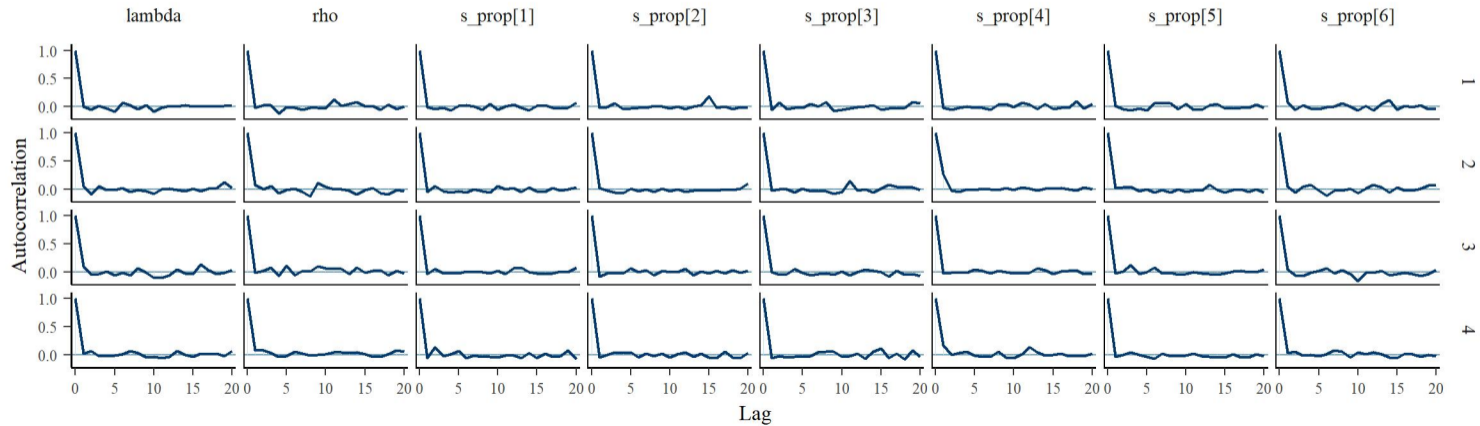

Pondicherry  
Medium India

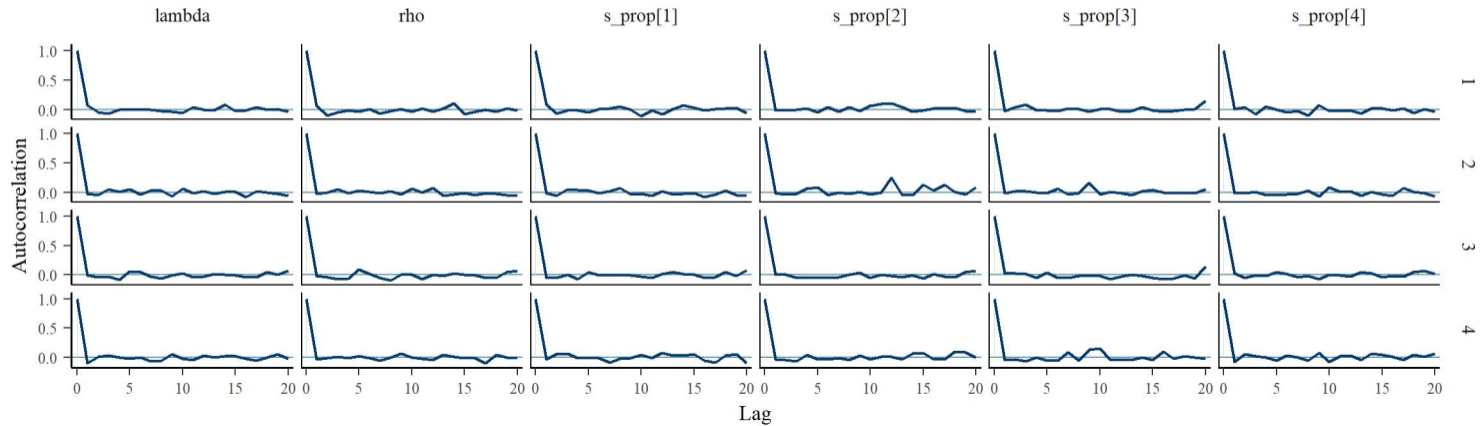

Nation  
South Korea

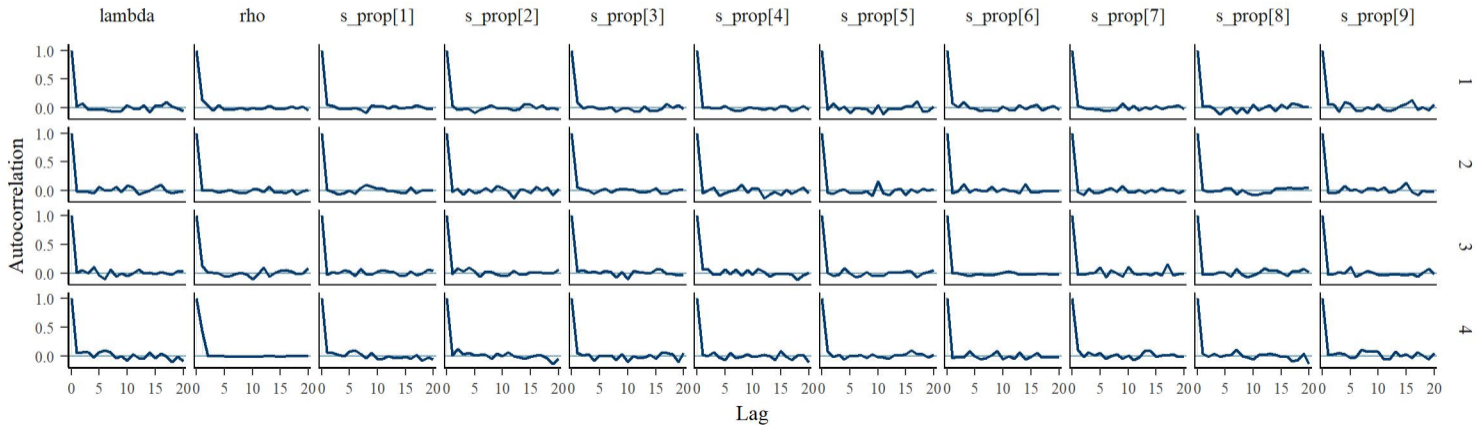

# Jinan High China

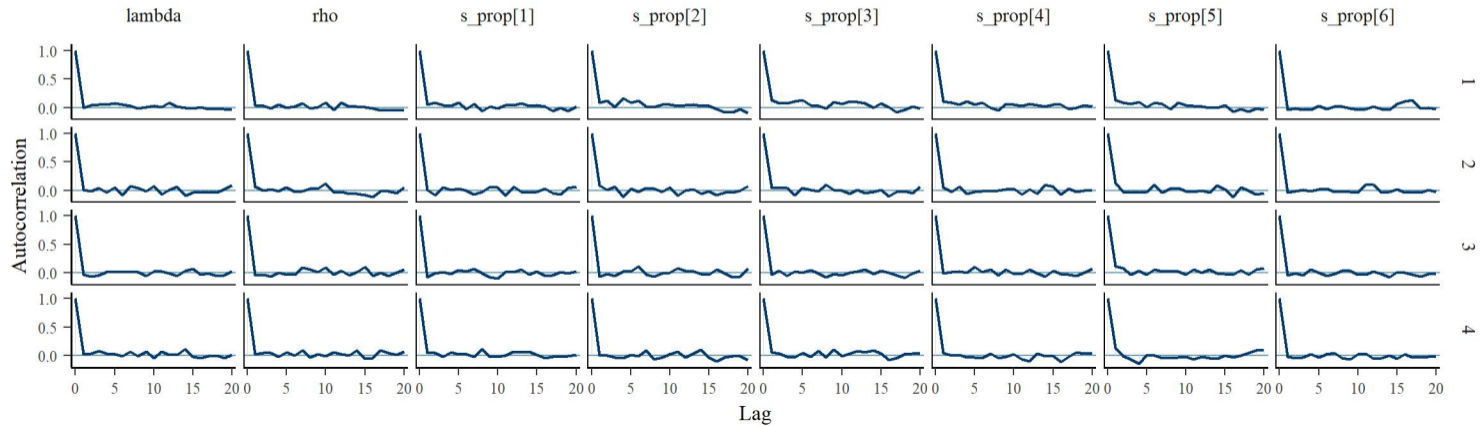

# Southern Taiwan

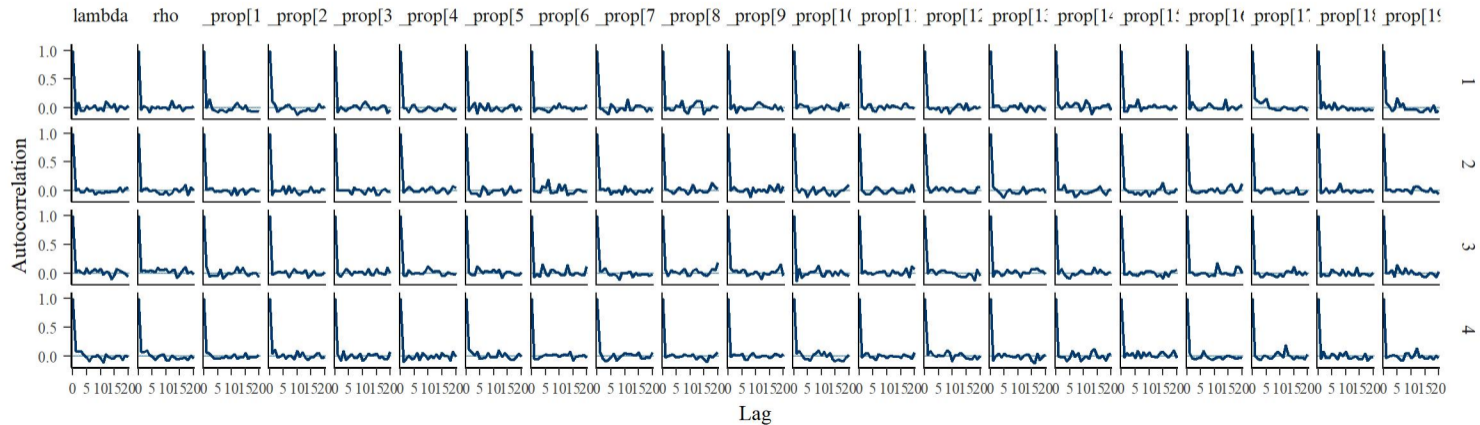

Nation  
Sri Lanka

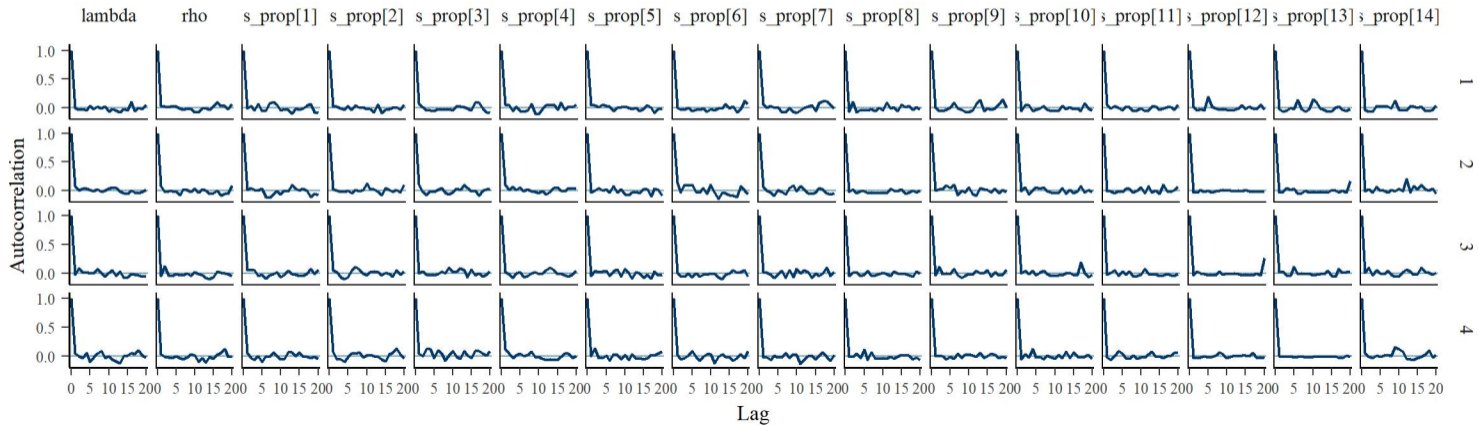

Taipei  
Taiwan

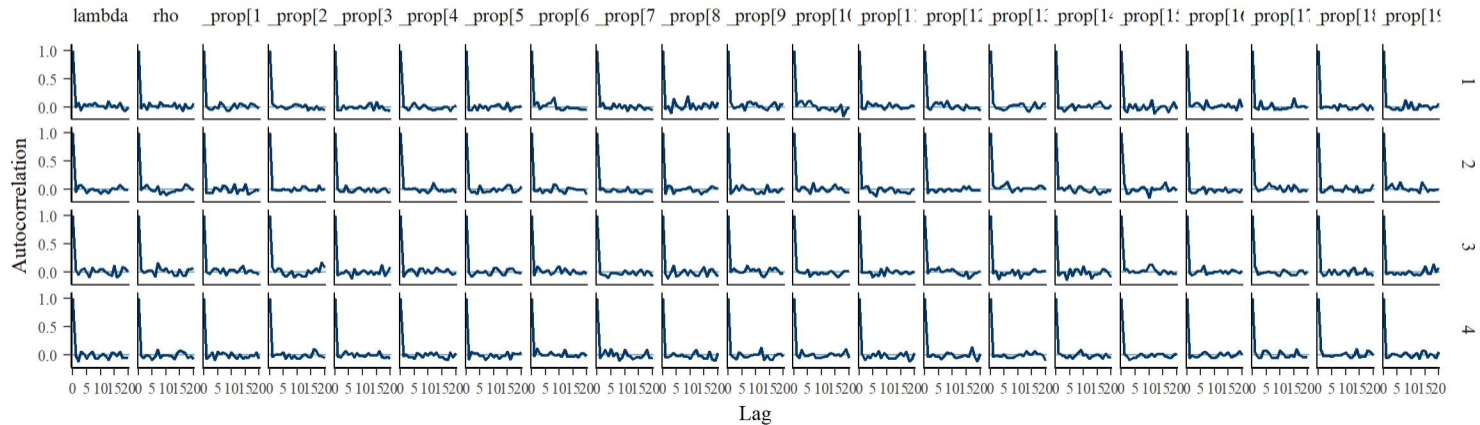



Nation  
Taiwan

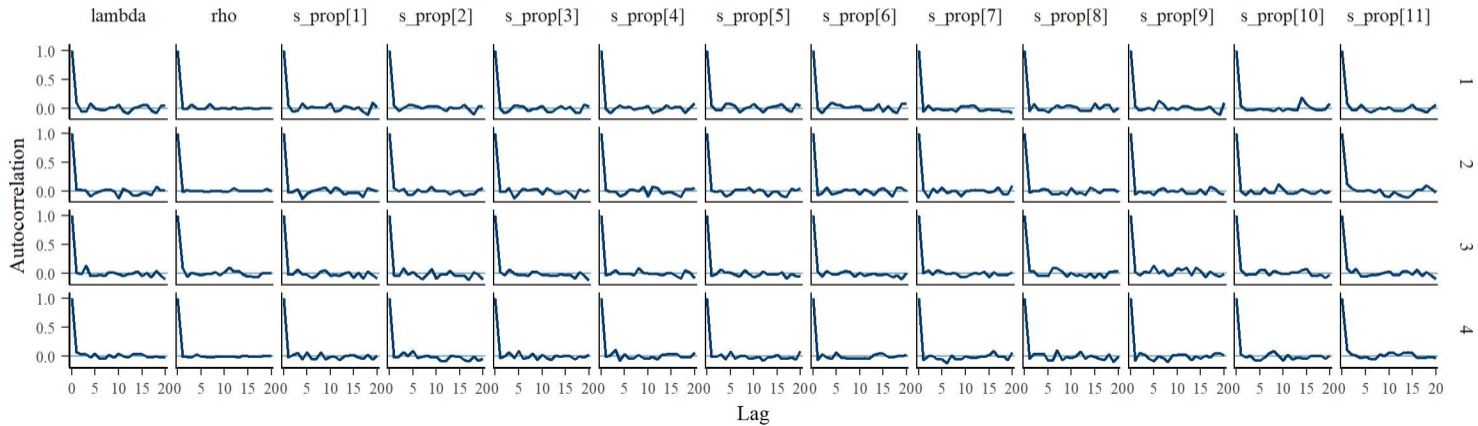

# Tamil Nadu Medium India

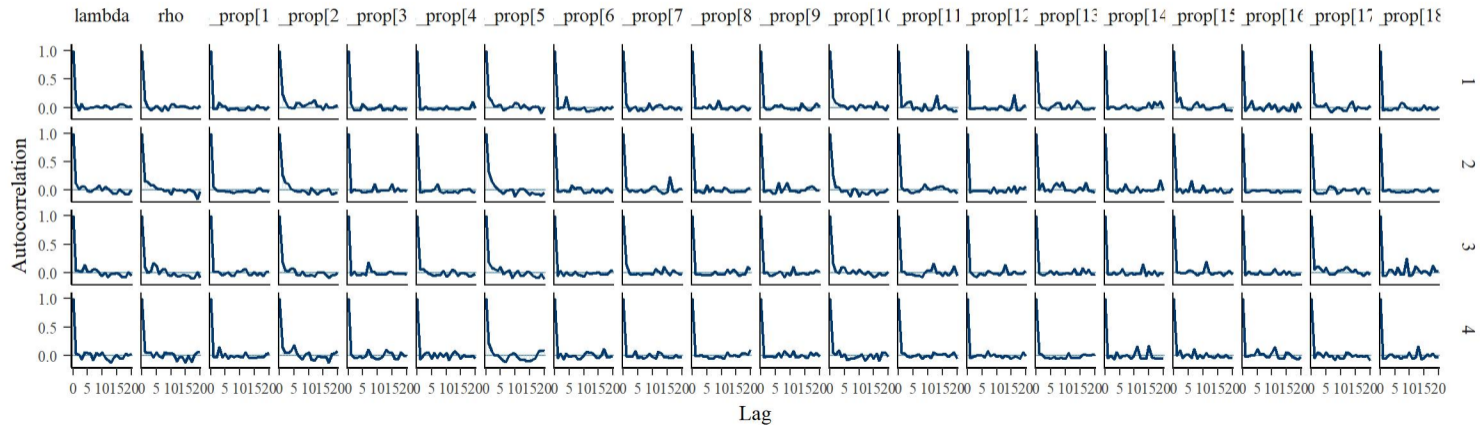



Vientiane  
Laos

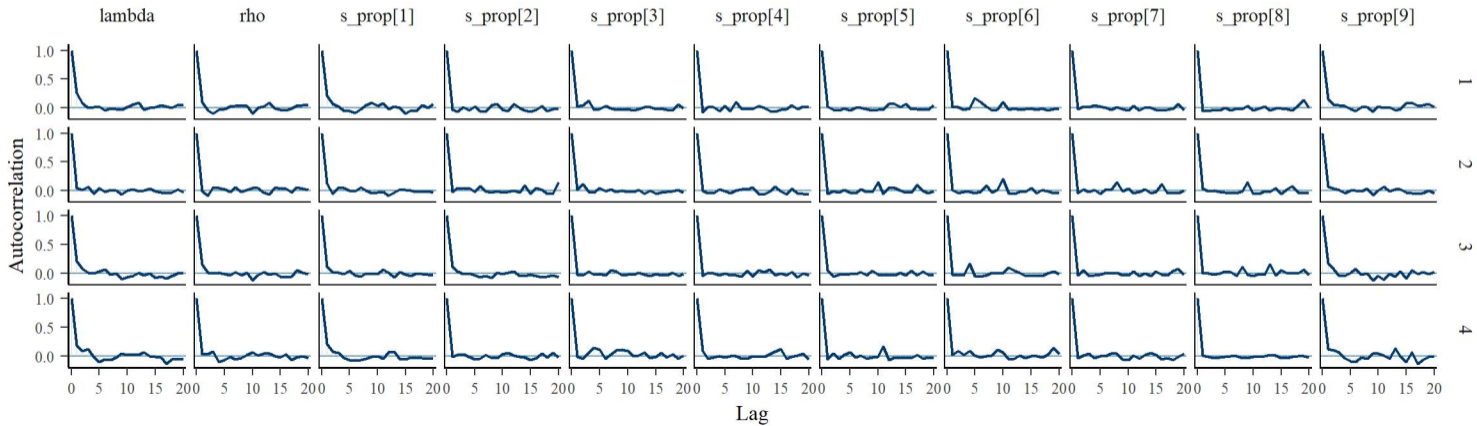

Western Terai  
High Nepal

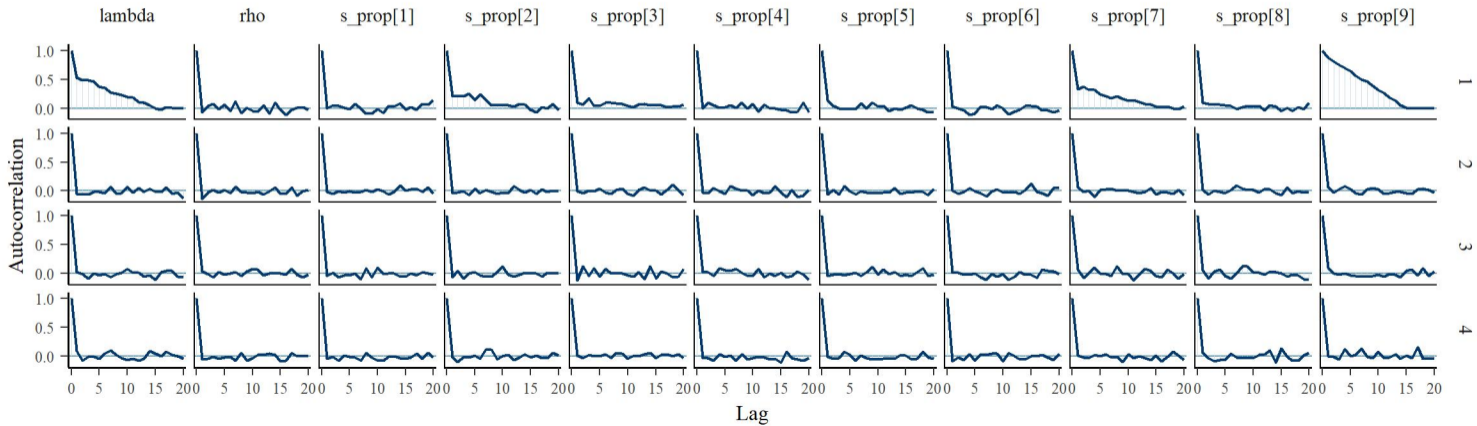

West Bengal  
Medium India

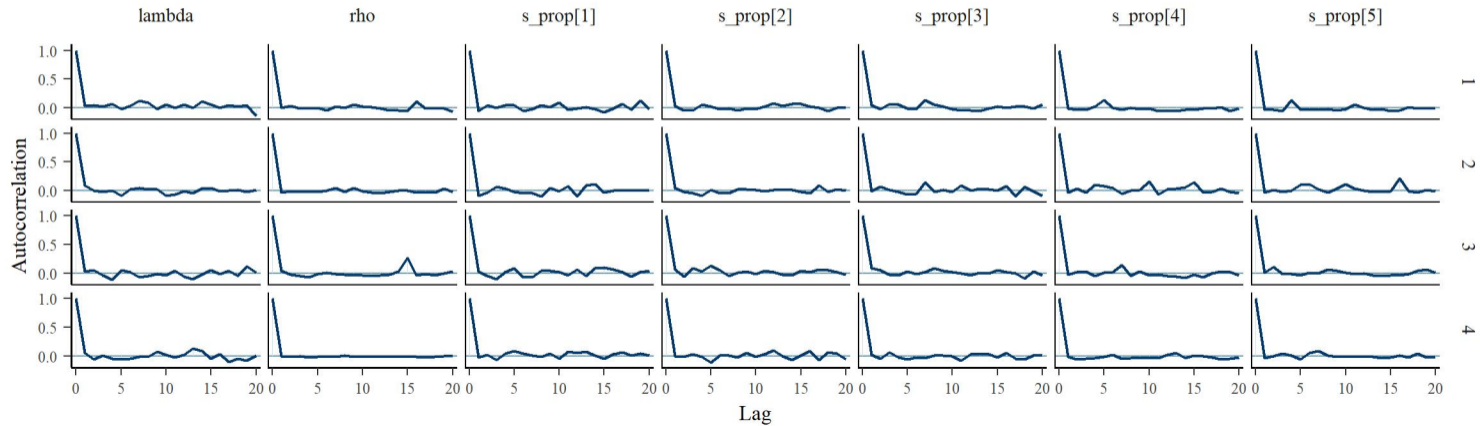

Supplement: supp [file elife-51027-supp-v1.zip]
