# Supplementary material for: Estimates of the global burden of Japanese encephalitis and the impact of vaccination from 2000-2015
Source: eLife journal article supplement (doi:10.7554/elife.51027), 2020-05-25
Supplement: supp [file elife-51027-supp-v1.zip]

# Bangkok and Hat Yai Thailand

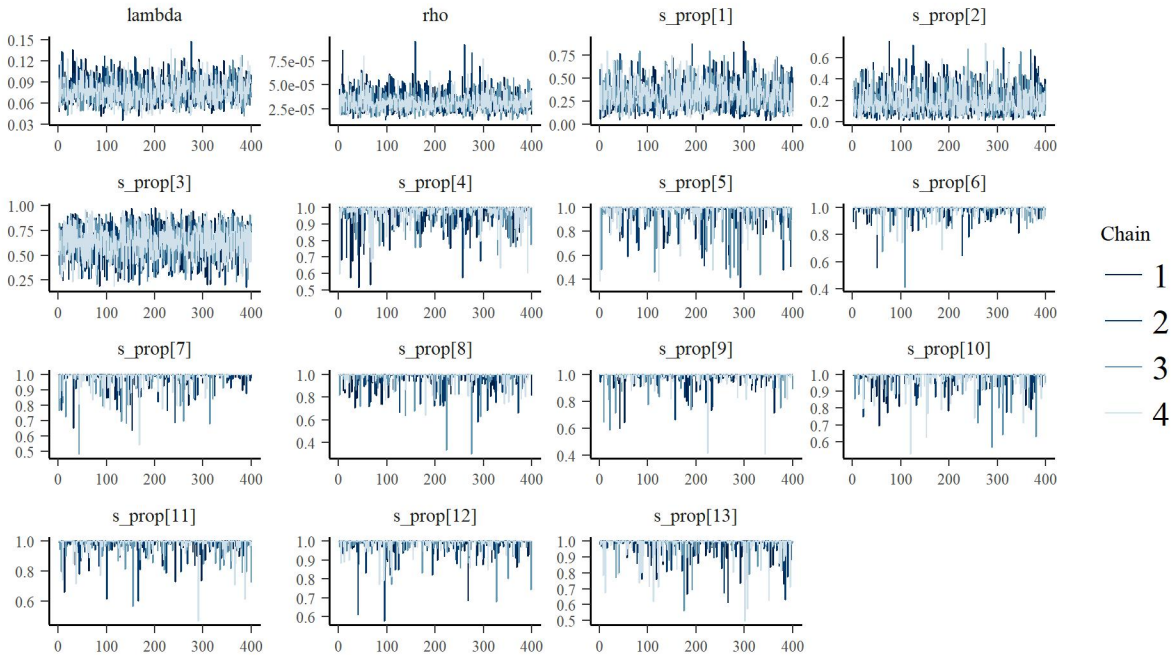

# 4 division Bangladesh

lambda

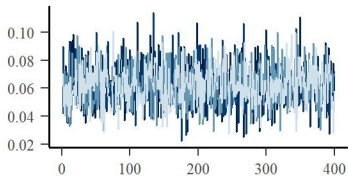

rho

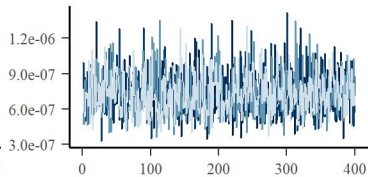

s\_prop[1]

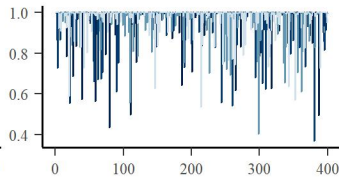

s\_prop[2]

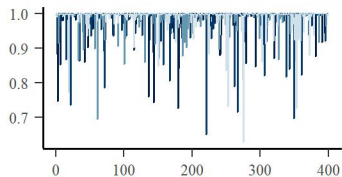

s\_prop[3]

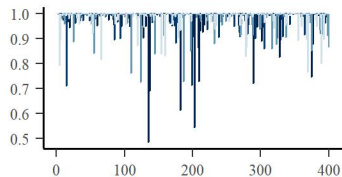

s\_prop[4]

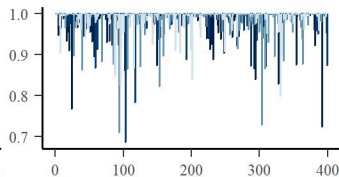

s\_prop[5]

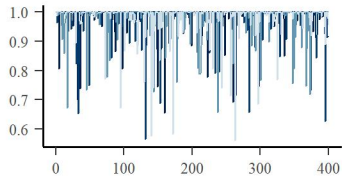

s\_prop[6]

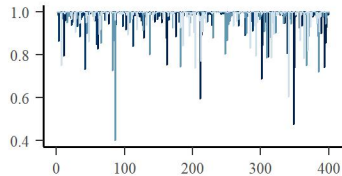

Chain

- 1
- 2
- 3
- 4

# 5 northern provinces Vietnam

lambda

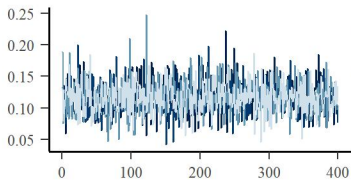

rho

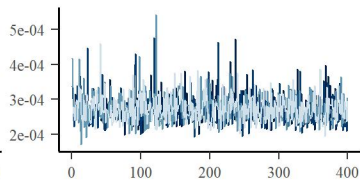

s\_prop[1]

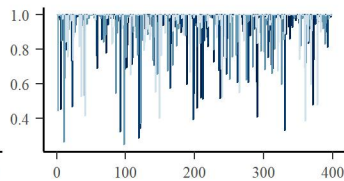

s\_prop[2]

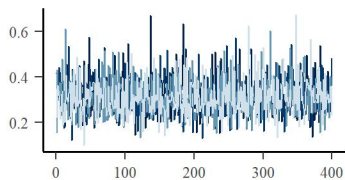

s\_prop[3]

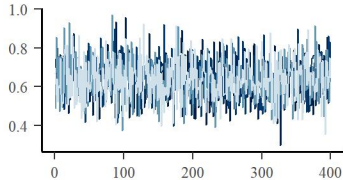

s\_prop[4]

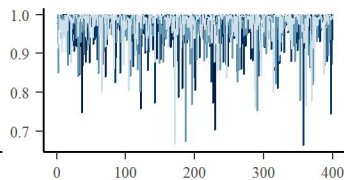

s\_prop[5]

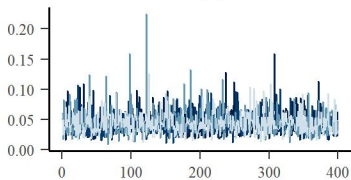

Chain

- 1
- 2
- 3
- 4

# 6 provinces Low and High Indonesia

lambda

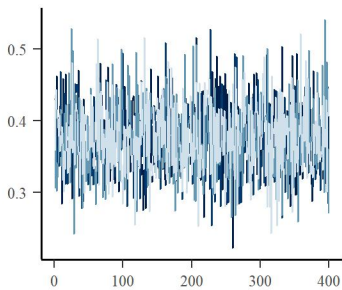

rho

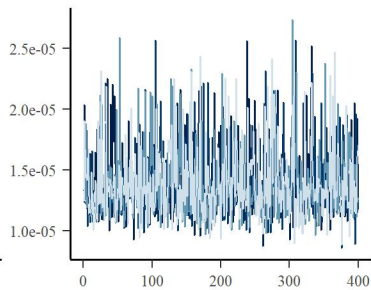

s\_prop[1]

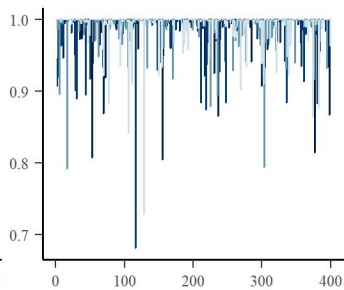

s\_prop[2]

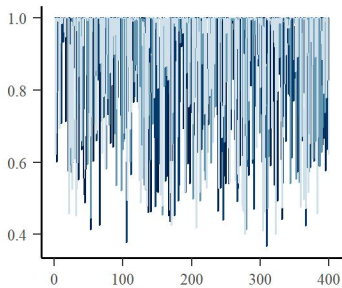

s\_prop[3]

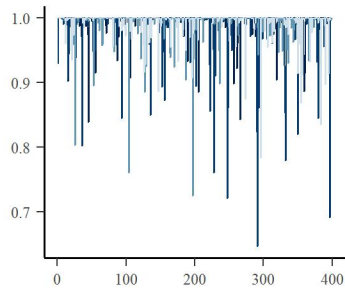

s\_prop[4]

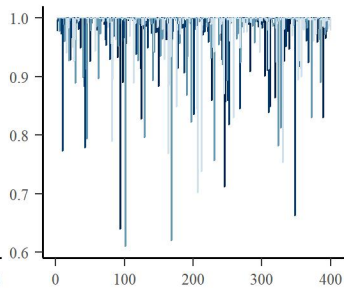

Chain

- 1
- 2
- 3
- 4

# 13 southern provinces Vietnam

lambda

rho

s\_prop[1]

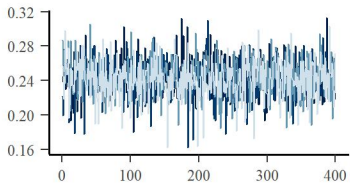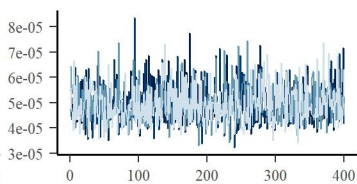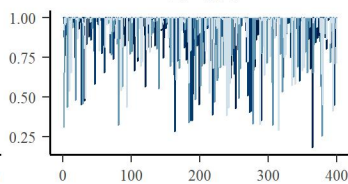

s\_prop[2]

s\_prop[3]

s\_prop[4]

Chain

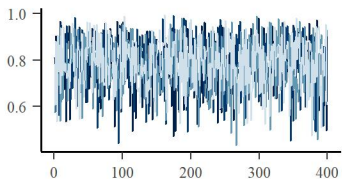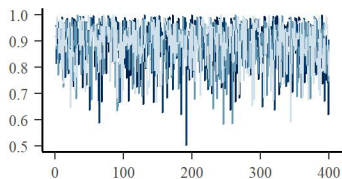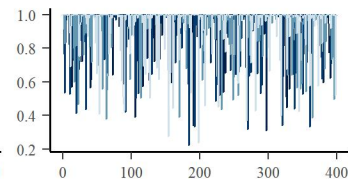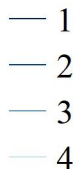

s\_prop[5]

s\_prop[6]

s\_prop[7]

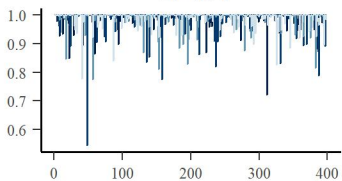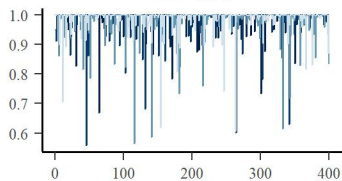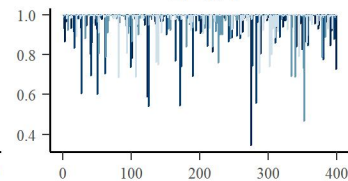

Assam  
Medium India

lambda

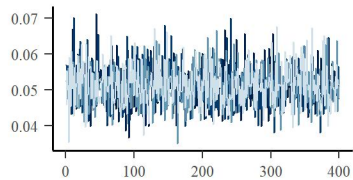

rho

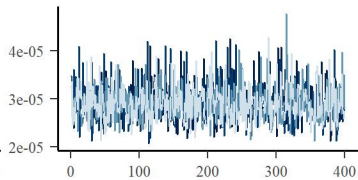

s\_prop[1]

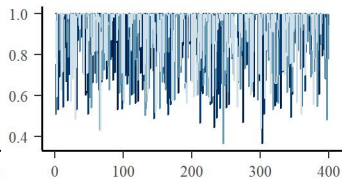

s\_prop[2]

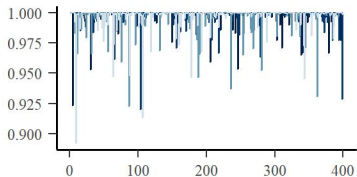

s\_prop[3]

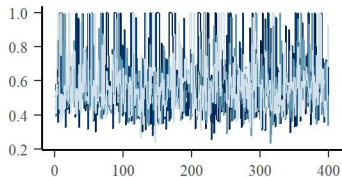

s\_prop[4]

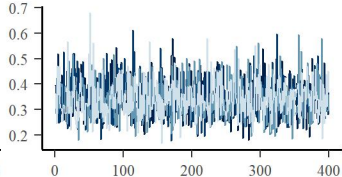

s\_prop[5]

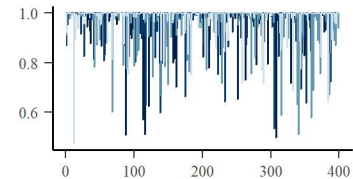

s\_prop[6]

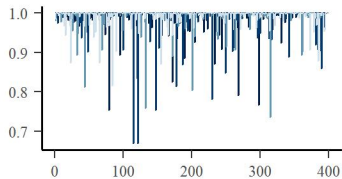

Chain

- 1
- 2
- 3
- 4

# Bali

## Low and High Indonesia

lambda

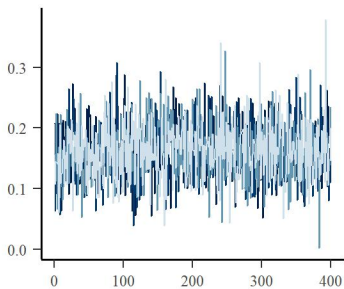

rho

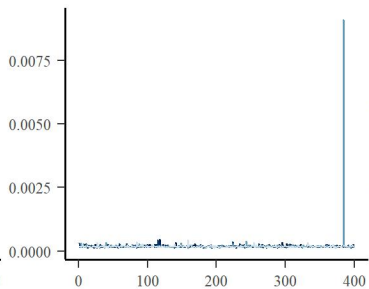

s\_prop[1]

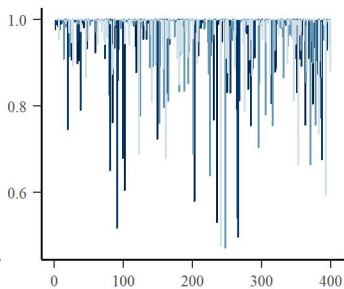

s\_prop[2]

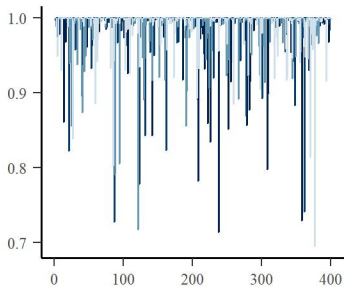

s\_prop[3]

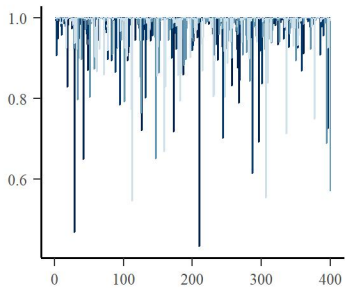

Chain

- 1
- 2
- 3
- 4

# Baoji High China

lambda

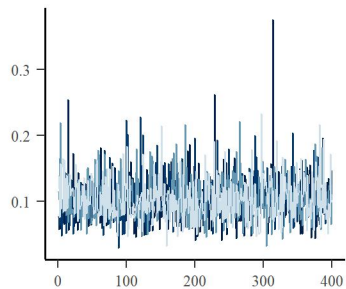

rho

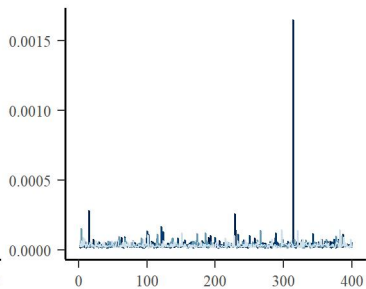

s\_prop[1]

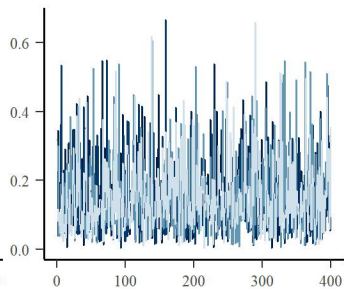

s\_prop[2]

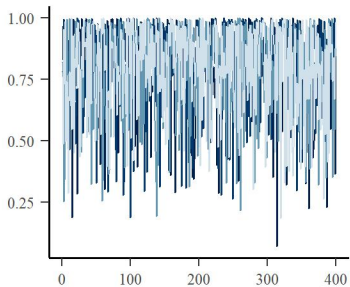

s\_prop[3]

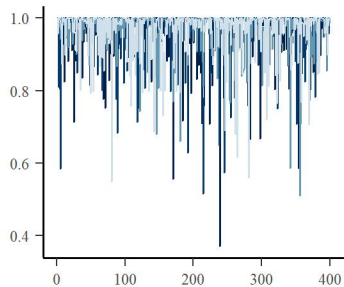

Chain

- 1
- 2
- 3
- 4



Bellary and neighbors  
Medium India

lambda

rho

s\_prop[1]

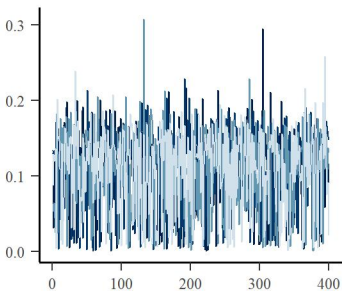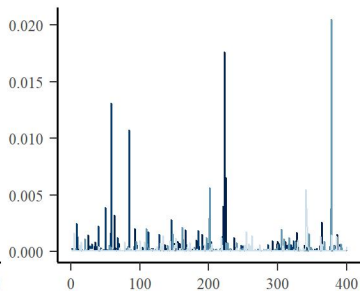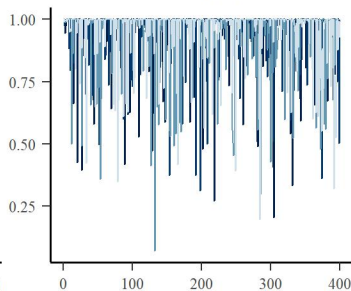

Chain

— 1

— 2

— 3

— 4

s\_prop[2]

s\_prop[3]

s\_prop[4]

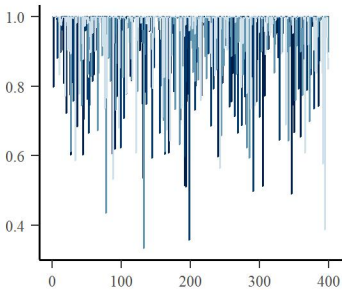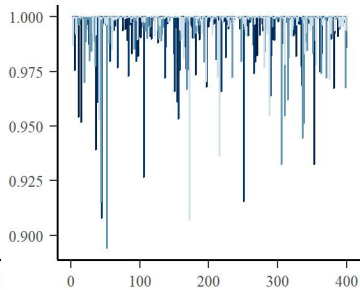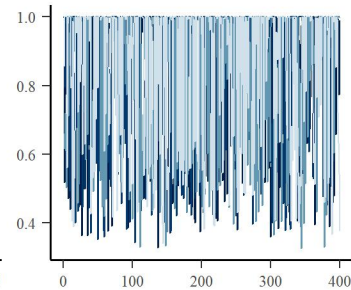

Bellary  
Medium India

lambda

rho

s\_prop[1]

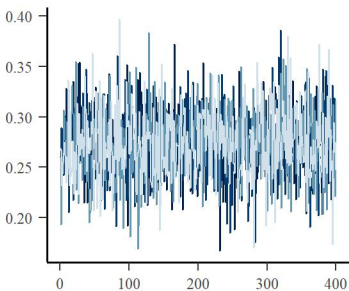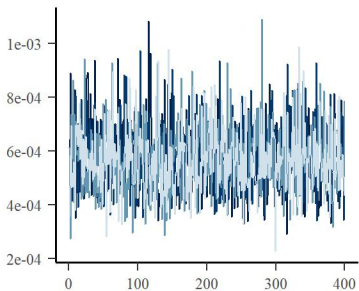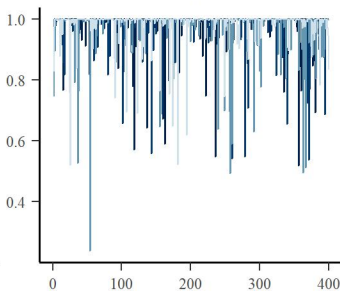

Chain

— 1

— 2

— 3

— 4

s\_prop[2]

s\_prop[3]

s\_prop[4]

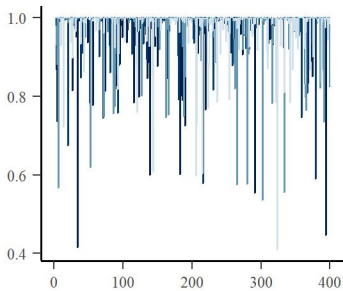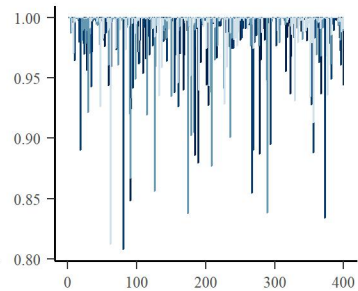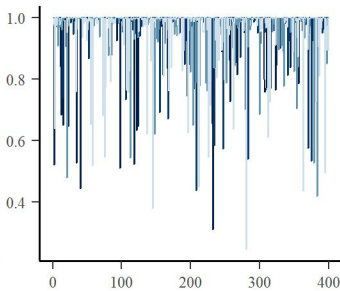

Nation  
Cambodia

lambda

rho

s\_prop[1]

Chain

- 1
- 2
- 3
- 4

s\_prop[2]

s\_prop[3]

s\_prop[4]

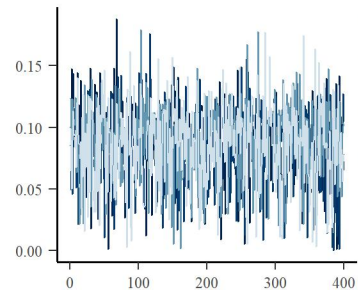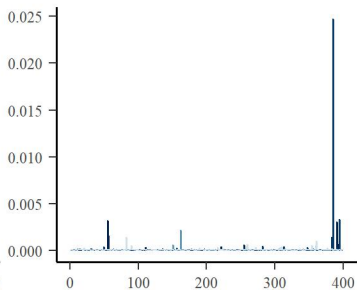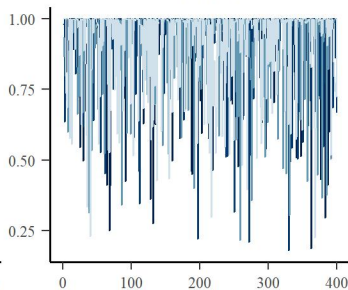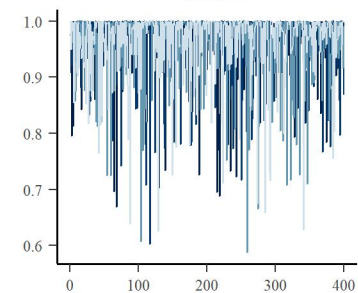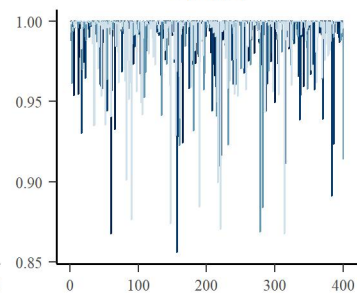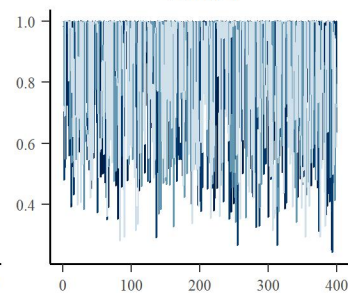

# Central Taiwan

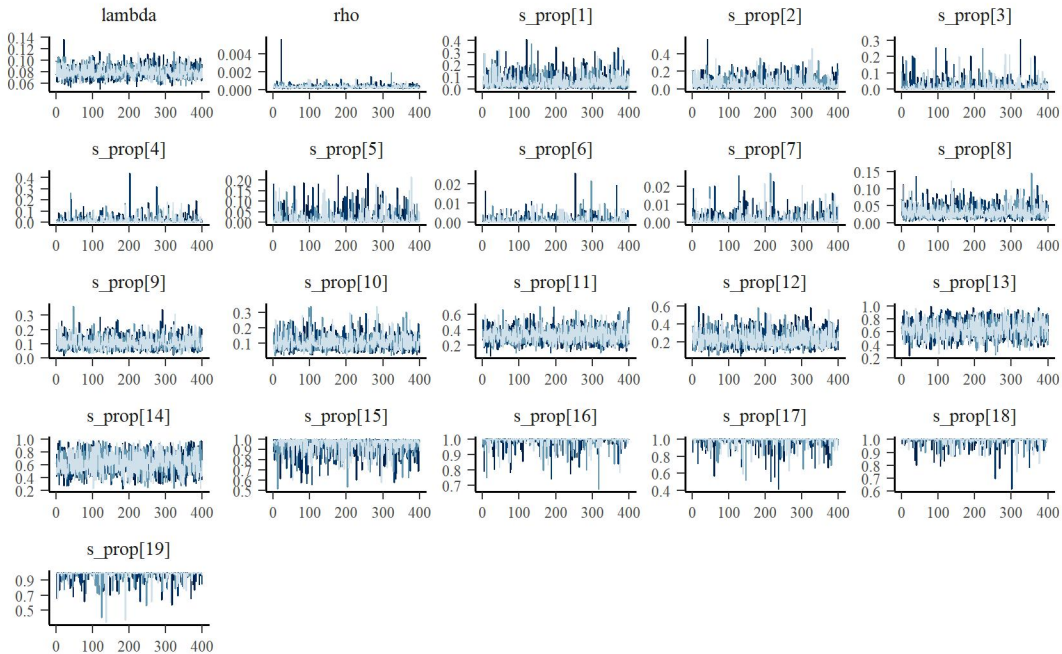

# Cuddalore Medium India

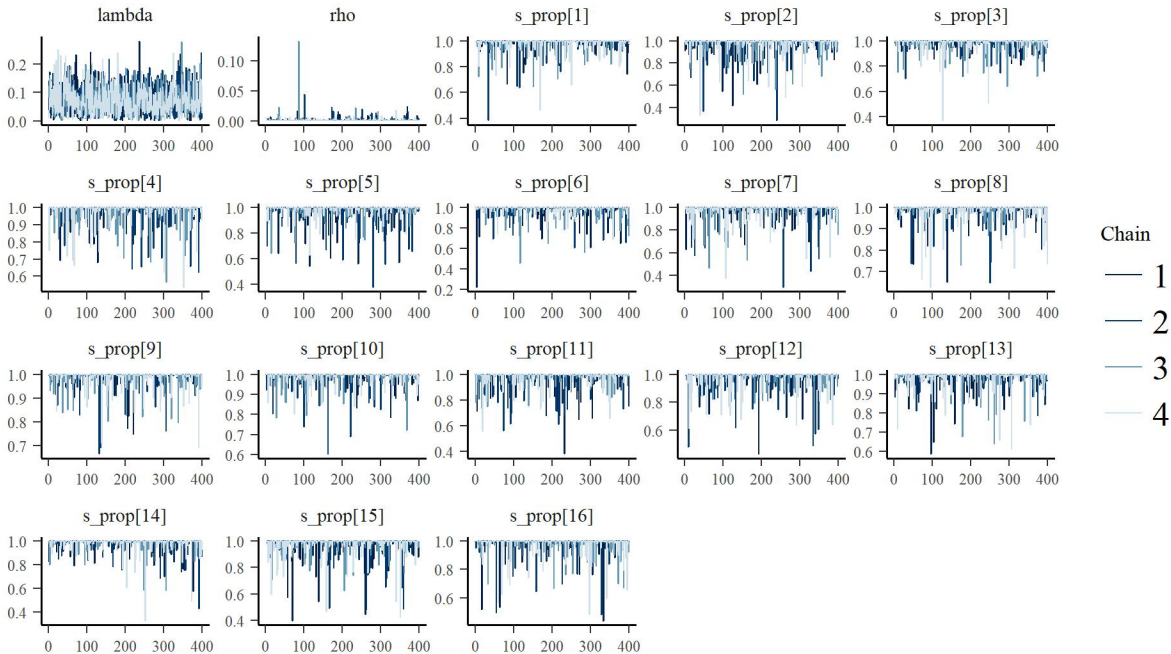

# Dhemaji Medium India

lambda

rho

s\_prop[1]

s\_prop[2]

s\_prop[3]

s\_prop[4]

s\_prop[5]

Chain

— 1  
— 2  
— 3  
— 4

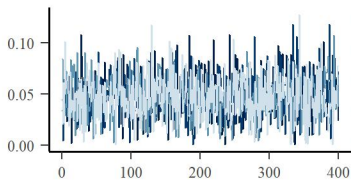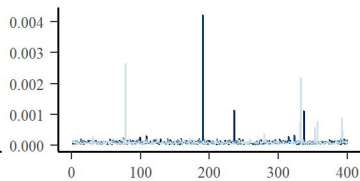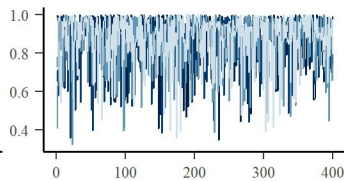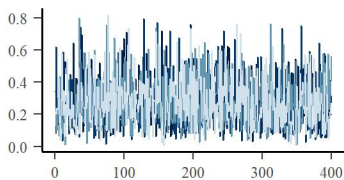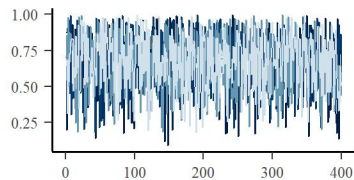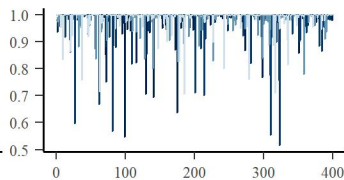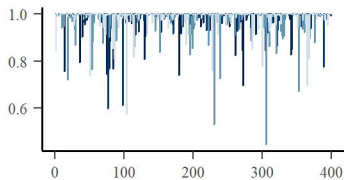

# Eastern Taiwan

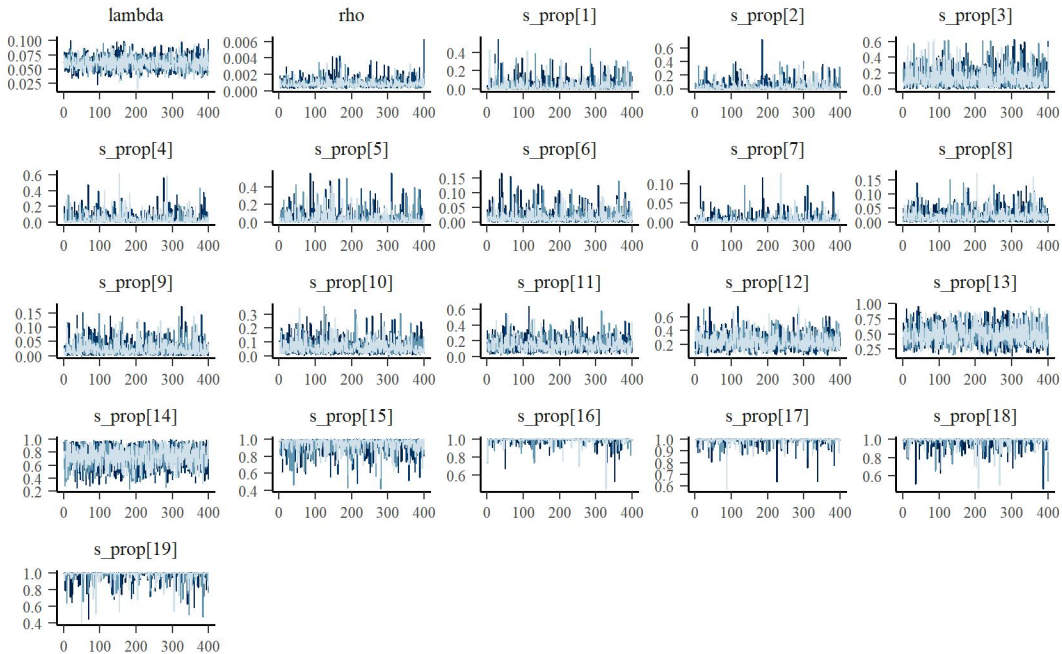

# Gorakhpur district High India

lambda

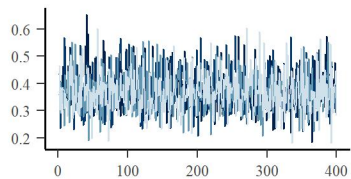

rho

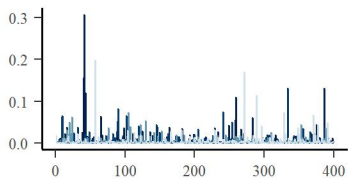

s\_prop[1]

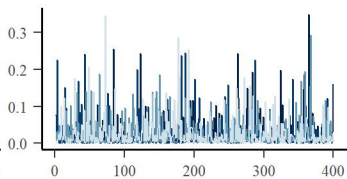

s\_prop[2]

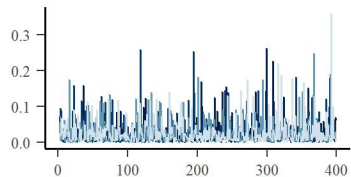

s\_prop[3]

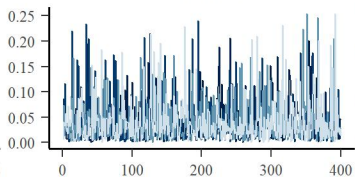

s\_prop[4]

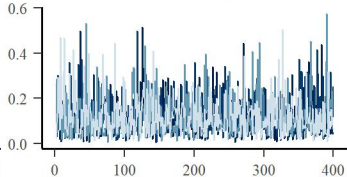

s\_prop[5]

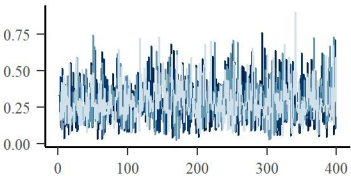

s\_prop[6]

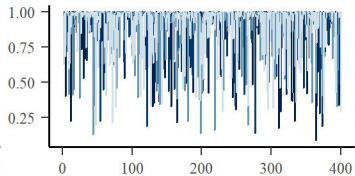

s\_prop[7]

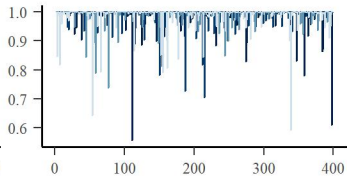

Chain

- 1
- 2
- 3
- 4



# Gorakhpur division High India

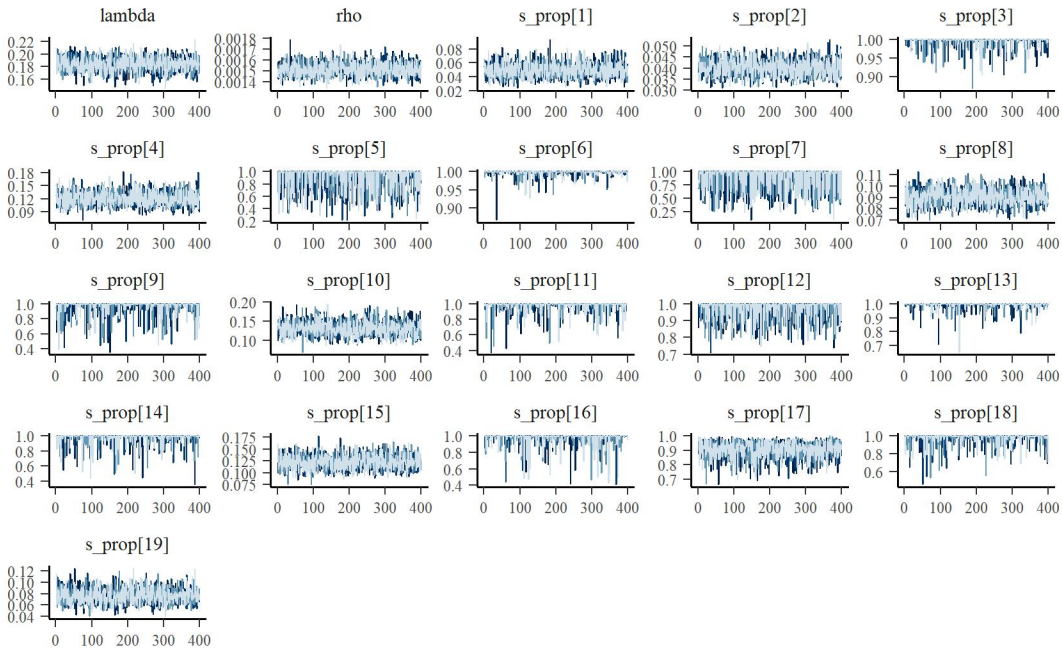

# Guigang High China

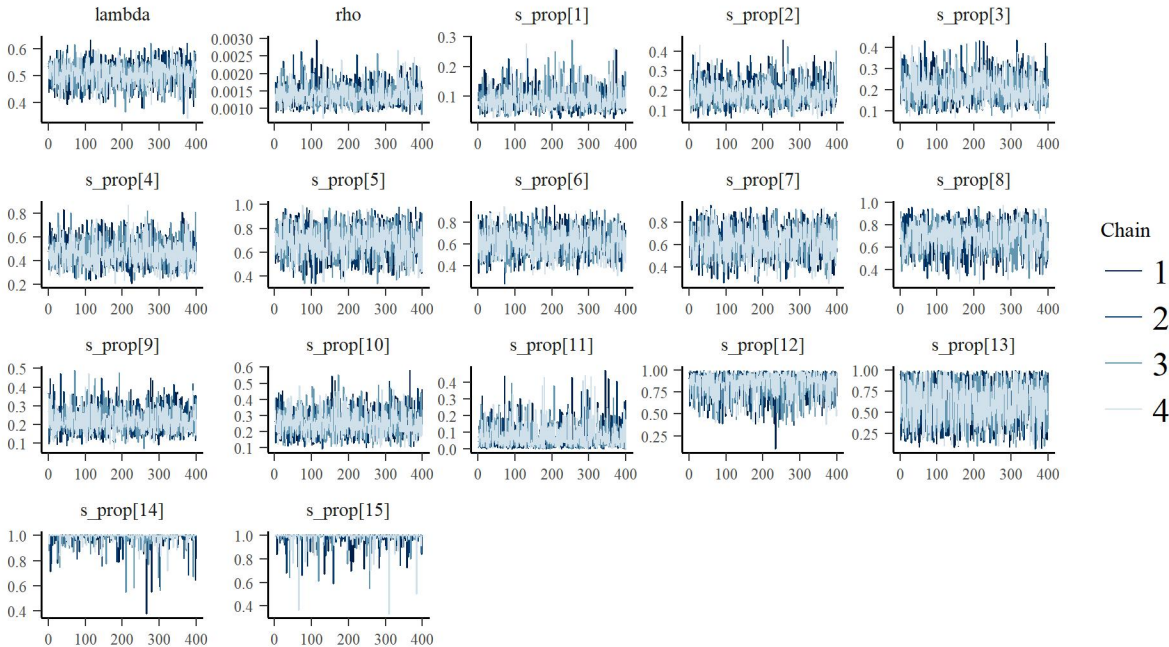

# Guizhou High China

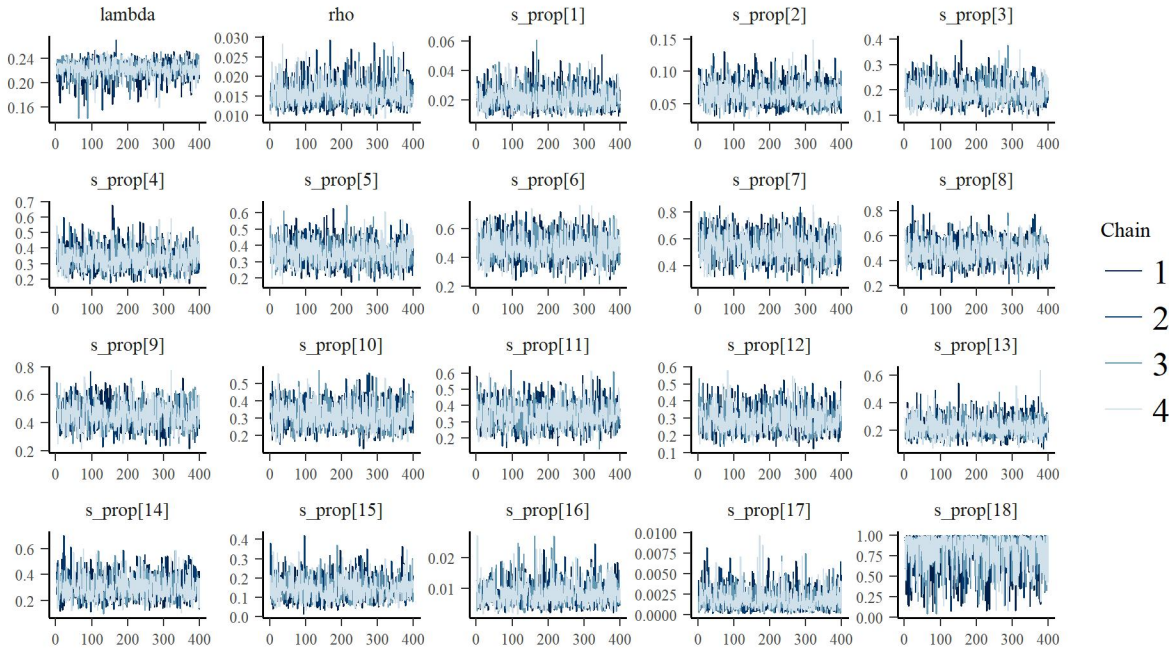

# Shijiazhuang Low China

lambda

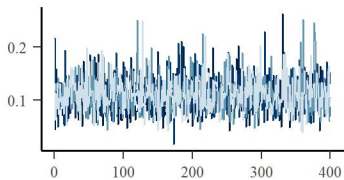

rho

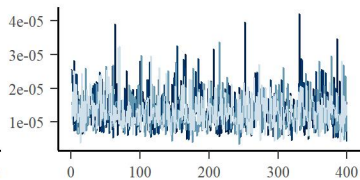

s\_prop[1]

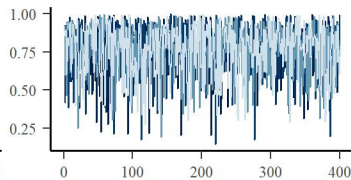

s\_prop[2]

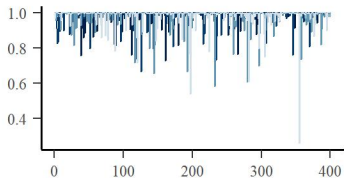

s\_prop[3]

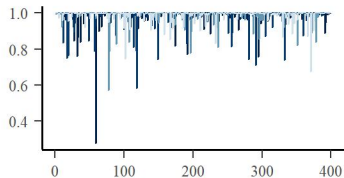

s\_prop[4]

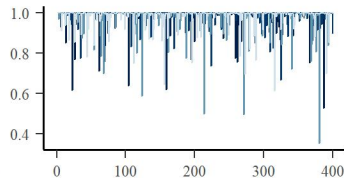

s\_prop[5]

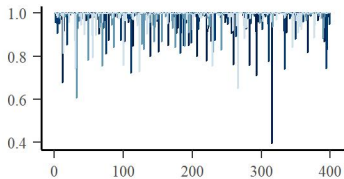

s\_prop[6]

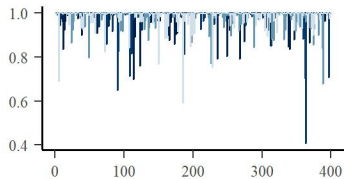

Chain

- 1
- 2
- 3
- 4

# Yichang High China

lambda

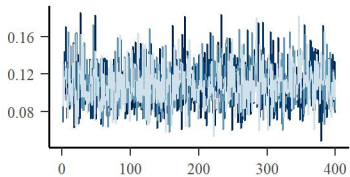

rho

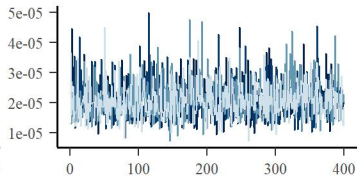

s\_prop[1]

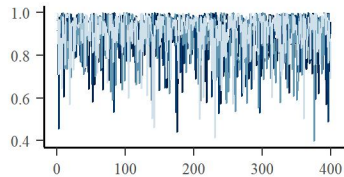

s\_prop[2]

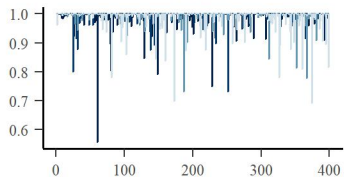

s\_prop[3]

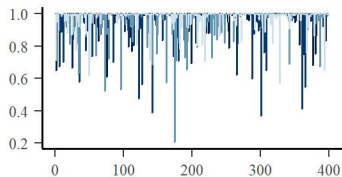

s\_prop[4]

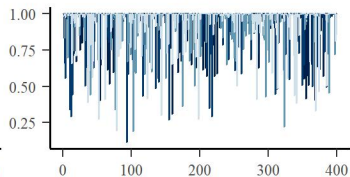

s\_prop[5]

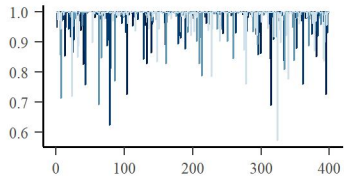

s\_prop[6]

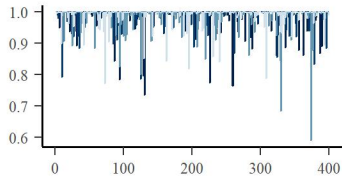

Chain

- 1
- 2
- 3
- 4

# Nation India

lambda

rho

s\_prop[1]

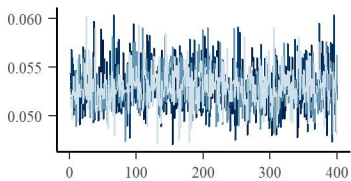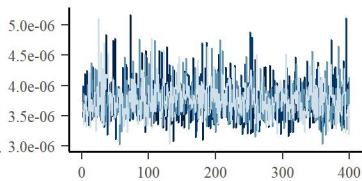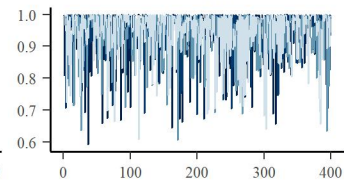

s\_prop[2]

s\_prop[3]

s\_prop[4]

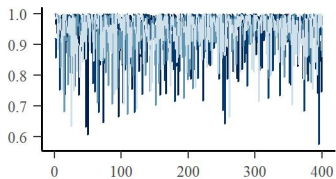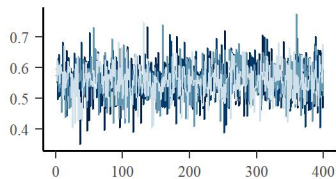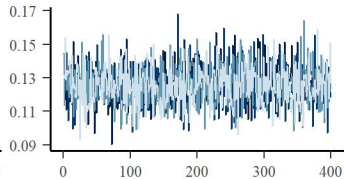

s\_prop[5]

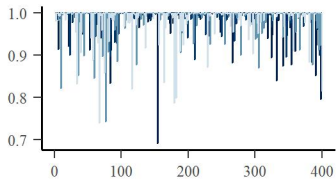

Chain

- 1
- 2
- 3
- 4

# Nation Japan

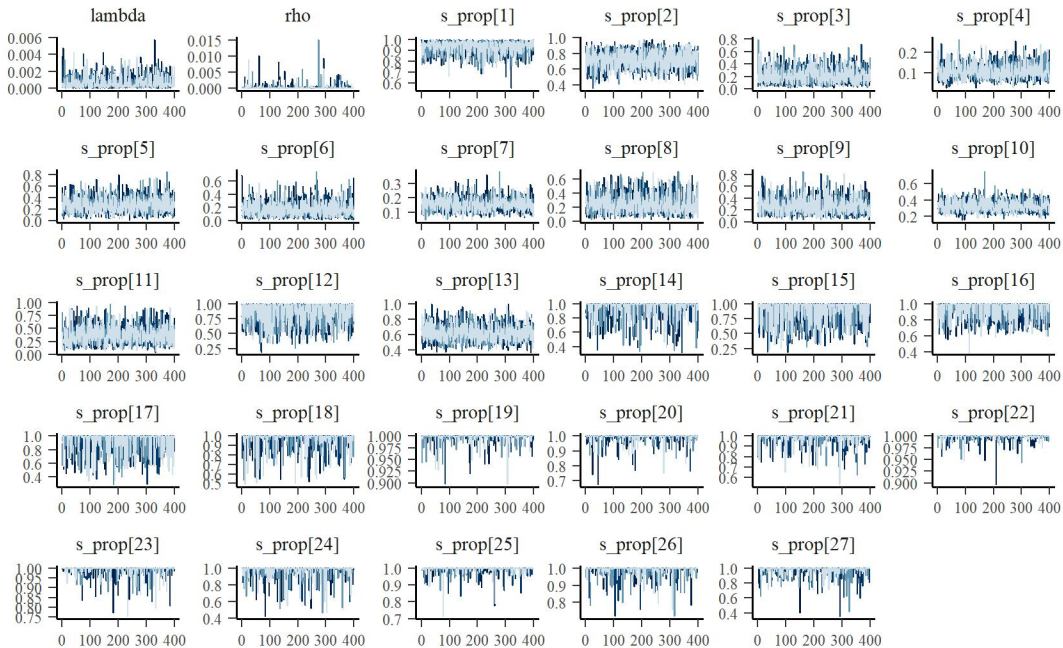

# Kaoping Taiwan

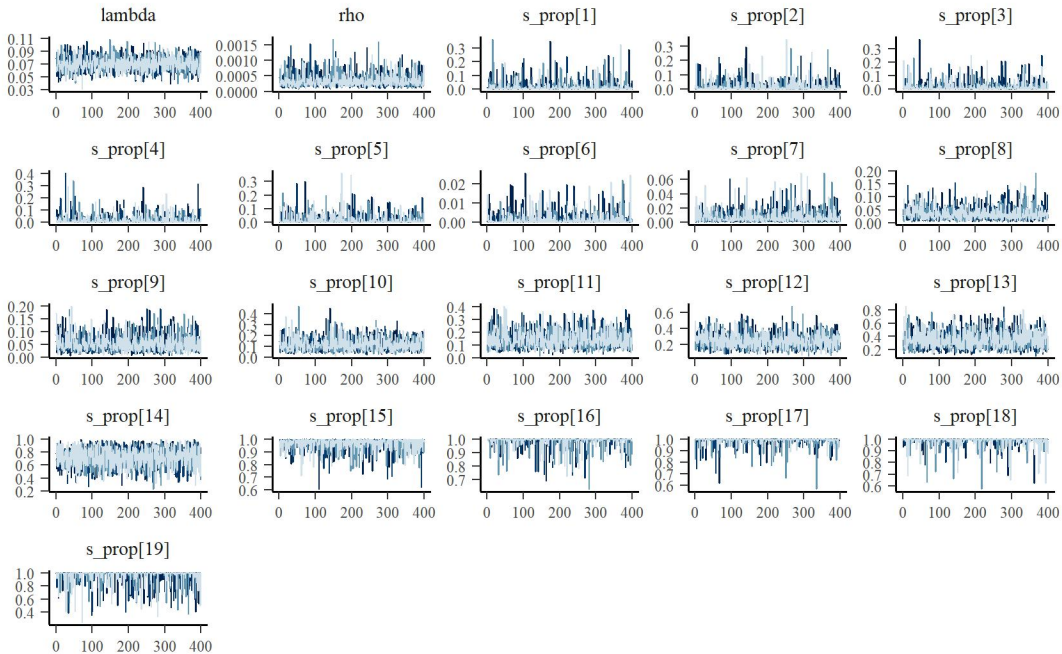



# Kathmandu districts Low Nepal

lambda

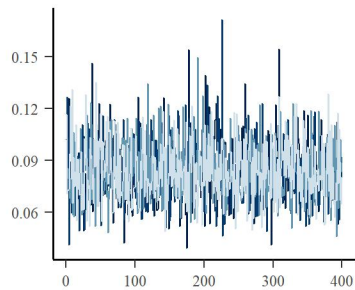

rho

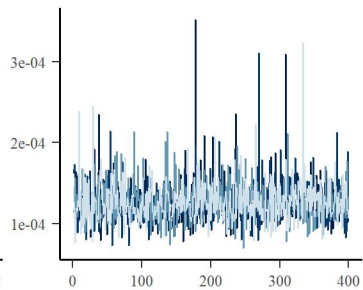

s\_prop[1]

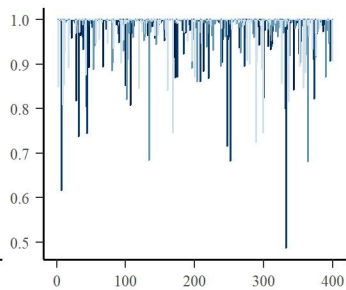

s\_prop[2]

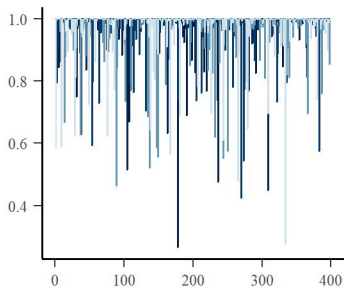

s\_prop[3]

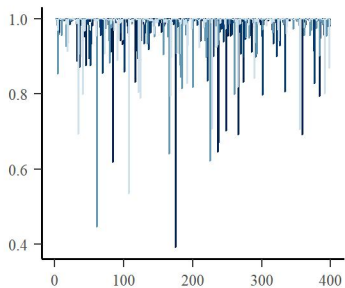

Chain

- 1
- 2
- 3
- 4

# Longnan High China

lambda

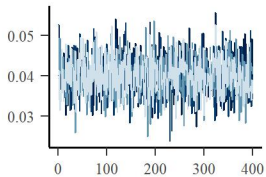

rho

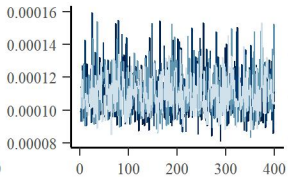

s\_prop[1]

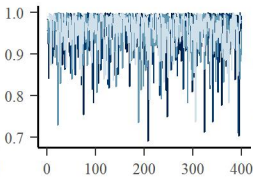

s\_prop[2]

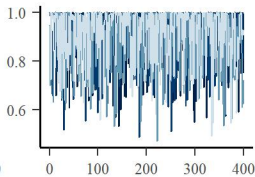

s\_prop[3]

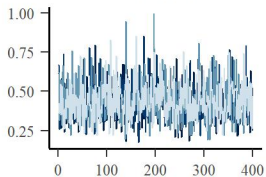

s\_prop[4]

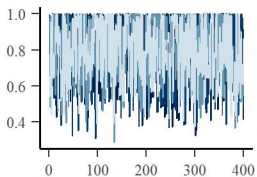

s\_prop[5]

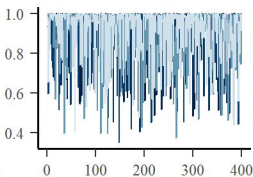

s\_prop[6]

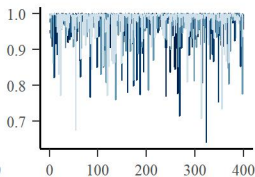

s\_prop[7]

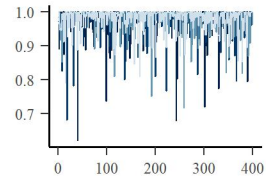

s\_prop[8]

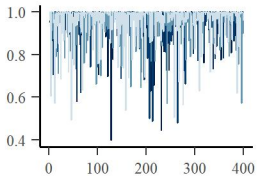

Chain

- 1
- 2
- 3
- 4

# Nation Malaysia

lambda

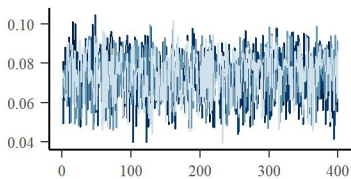

rho

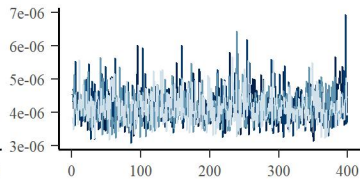

s\_prop[1]

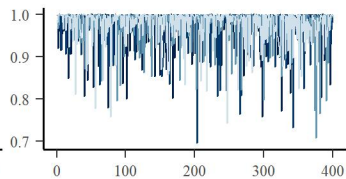

s\_prop[2]

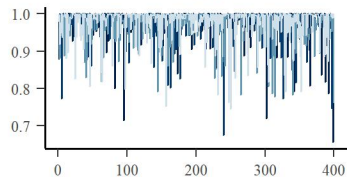

s\_prop[3]

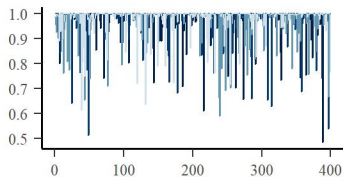

s\_prop[4]

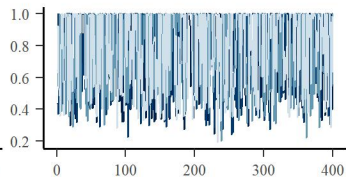

s\_prop[5]

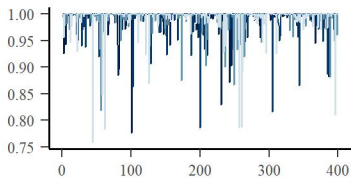

Chain

- 1
- 2
- 3
- 4

# Nation Nepal

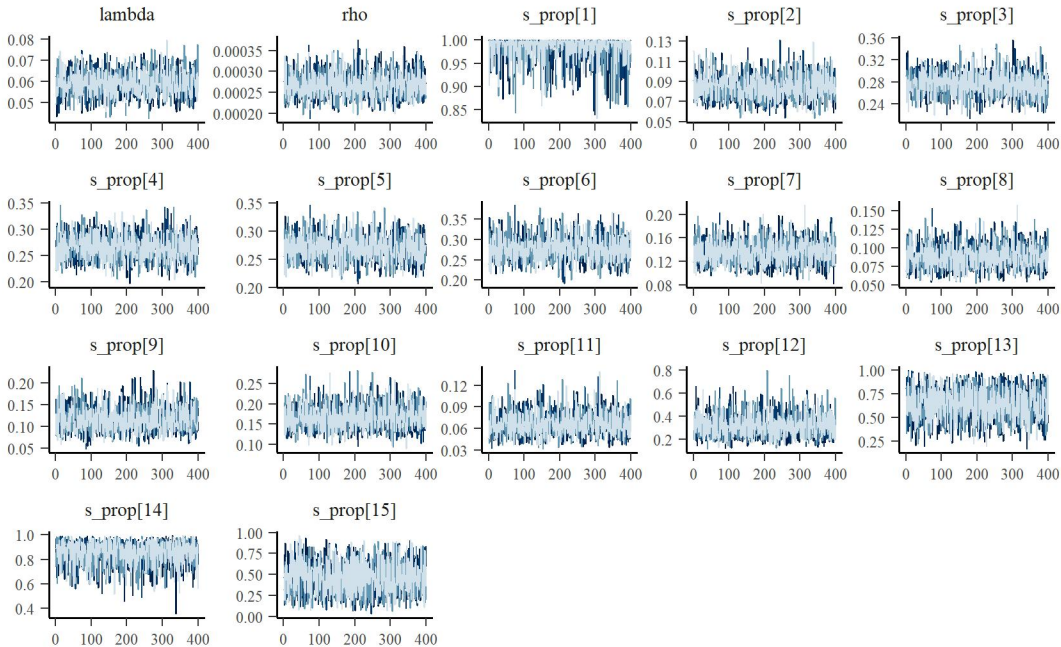

# Endemic provinces Low and High China

lambda

rho

s\_prop[1]

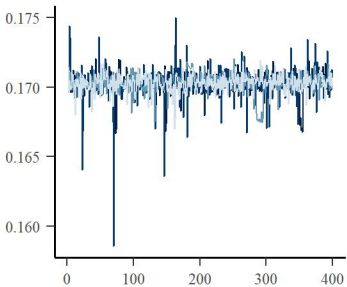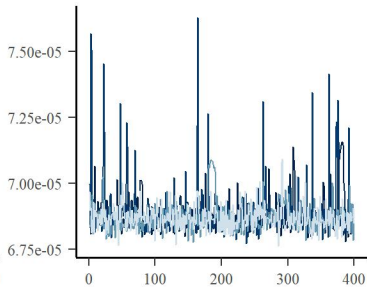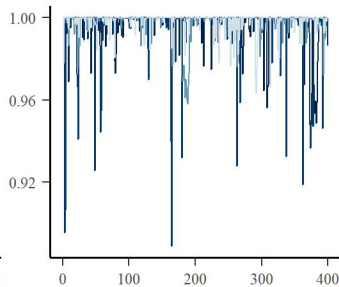

Chain

— 1

— 2

— 3

— 4

s\_prop[2]

s\_prop[3]

s\_prop[4]

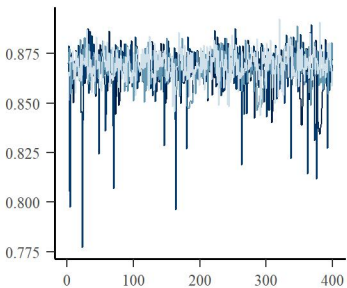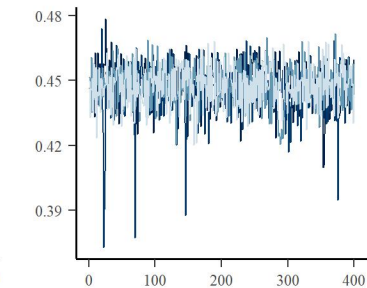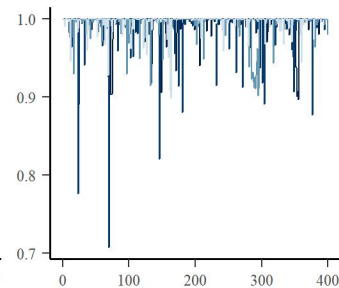

# Hill and mountain districts (not Kathmandu) - Low Nepal

lambda

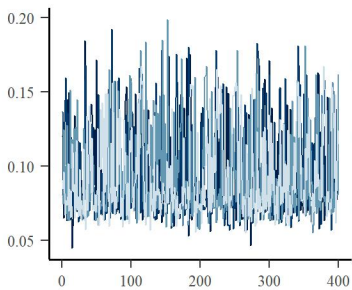

rho

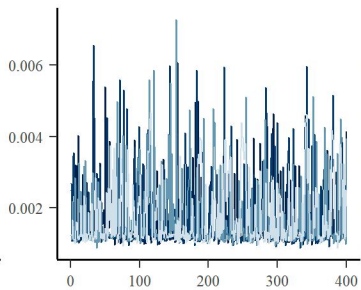

s\_prop[1]

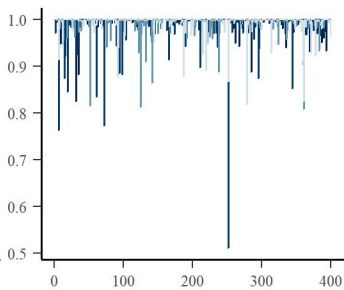

s\_prop[2]

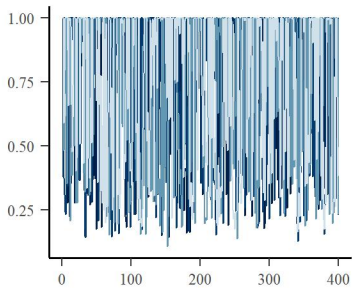

s\_prop[3]

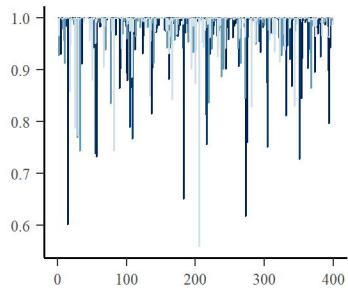

Chain

- 1
- 2
- 3
- 4

Not western Terai  
Low Nepal

lambda

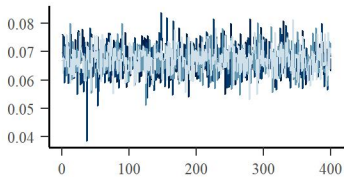

rho

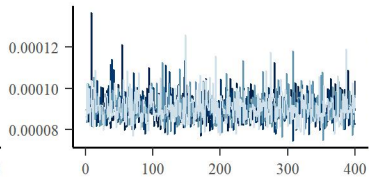

s\_prop[1]

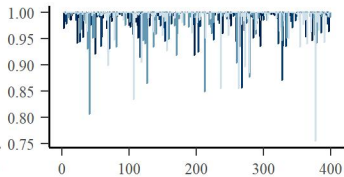

s\_prop[2]

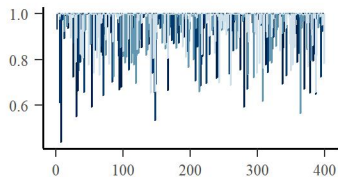

s\_prop[3]

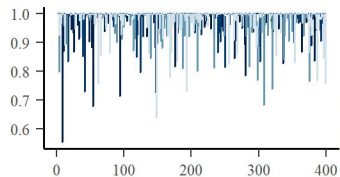

s\_prop[4]

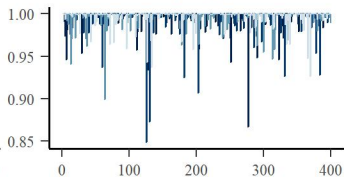

s\_prop[5]

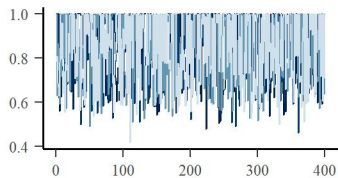

s\_prop[6]

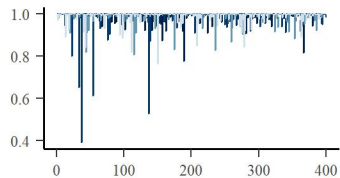

Chain

- 1
- 2
- 3
- 4

# Nothern of Uttar Pradesh High India

lambda

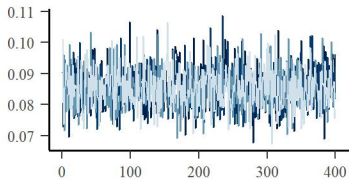

rho

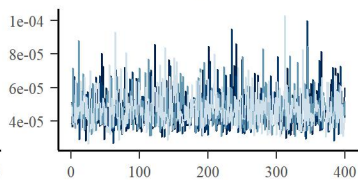

s\_prop[1]

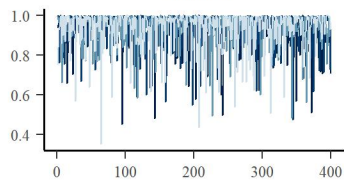

s\_prop[2]

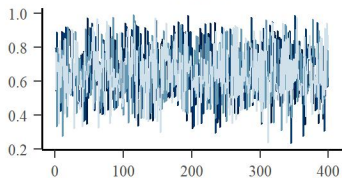

s\_prop[3]

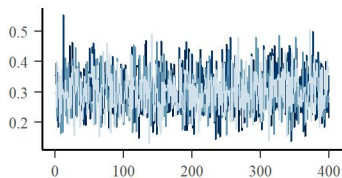

s\_prop[4]

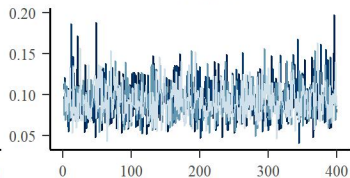

s\_prop[5]

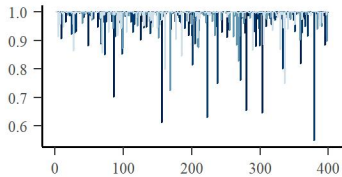

Chain

- 1
- 2
- 3
- 4



# Northern Taiwan

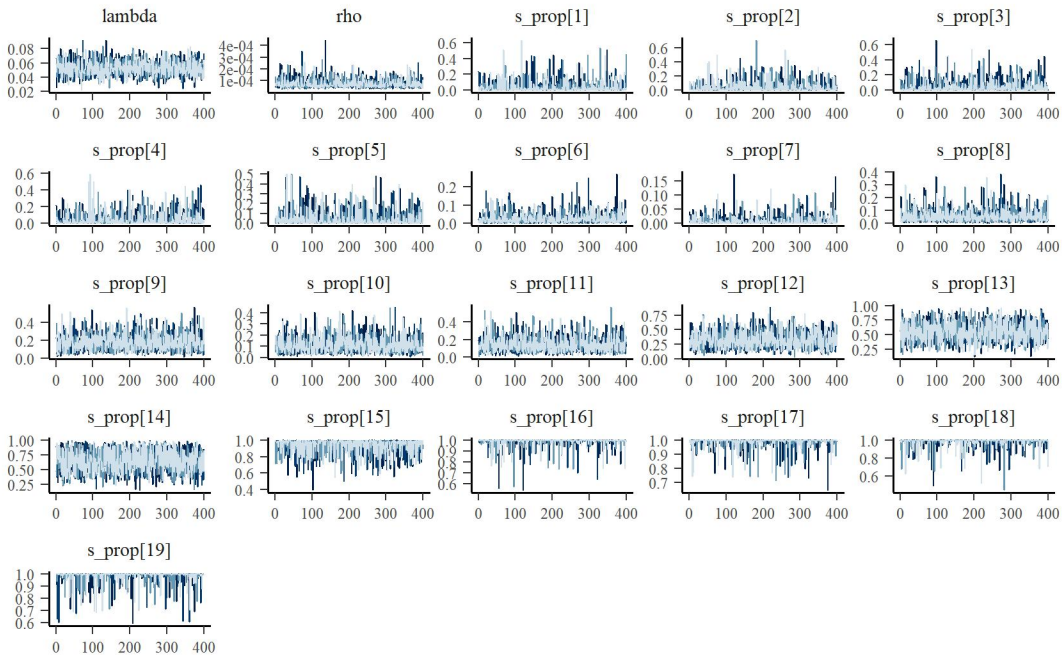

# Nation Philippines

lambda

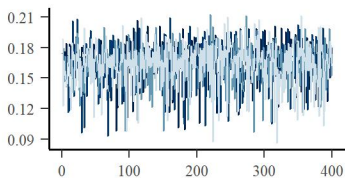

rho

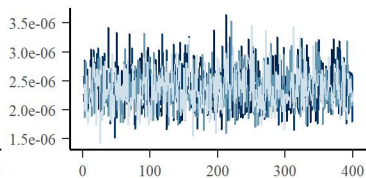

s\_prop[1]

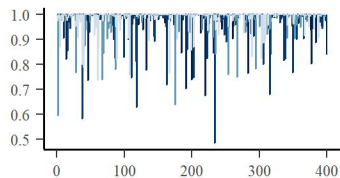

s\_prop[2]

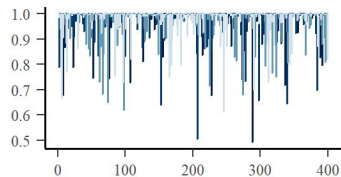

s\_prop[3]

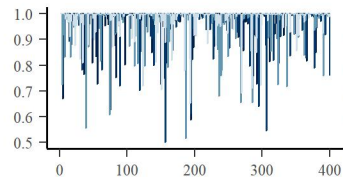

s\_prop[4]

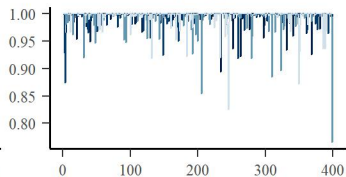

s\_prop[5]

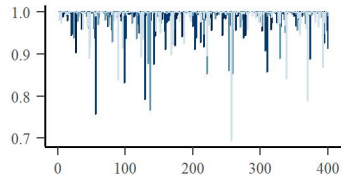

s\_prop[6]

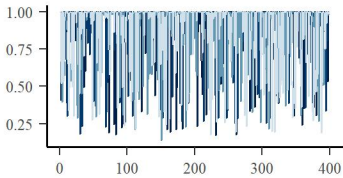

Chain

- 1
- 2
- 3
- 4

Pondicherry  
Medium India

lambda

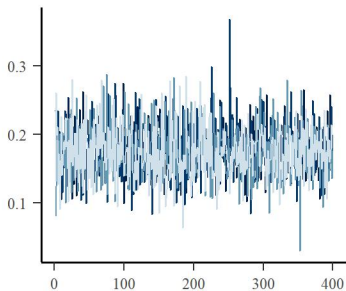

rho

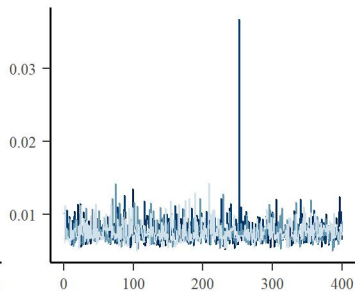

s\_prop[1]

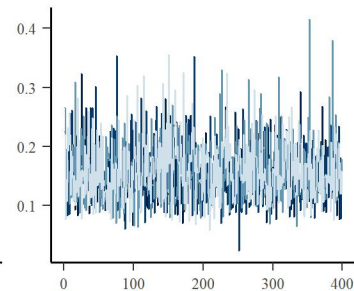

s\_prop[2]

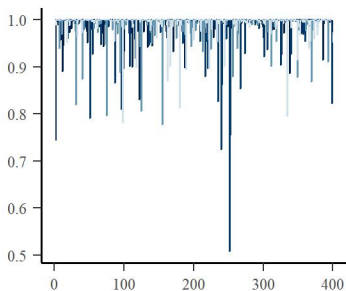

s\_prop[3]

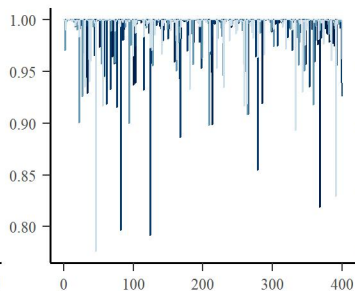

s\_prop[4]

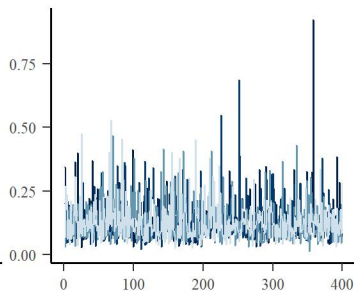

Chain

- 1
- 2
- 3
- 4

# Nation South Korea

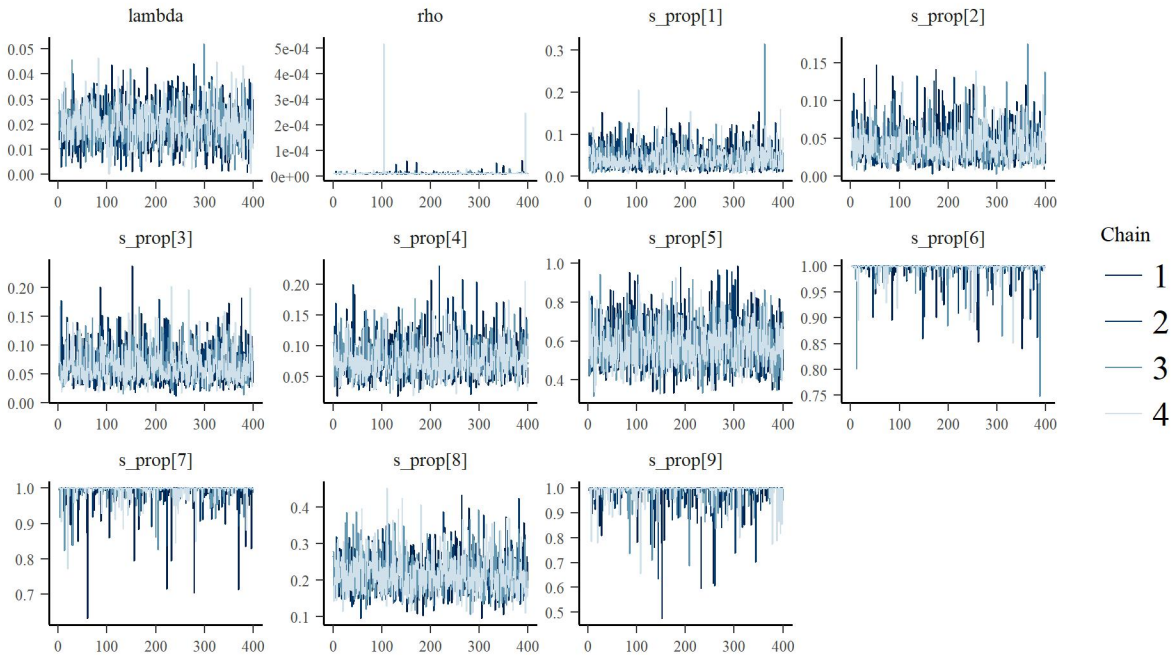

# Jinan High China

lambda

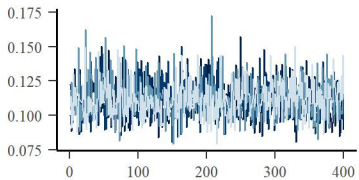

rho

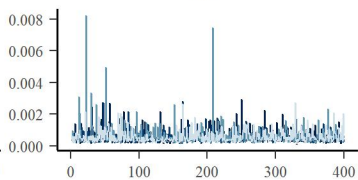

s\_prop[1]

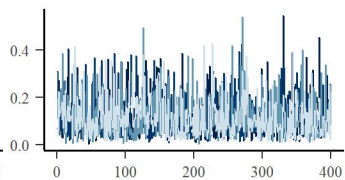

s\_prop[2]

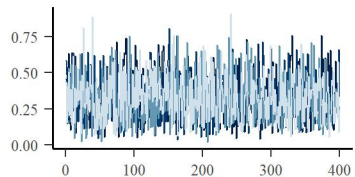

s\_prop[3]

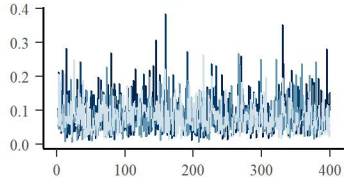

s\_prop[4]

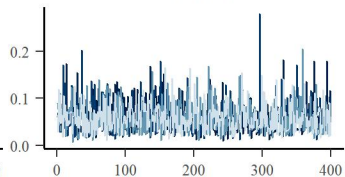

s\_prop[5]

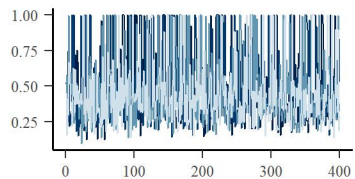

s\_prop[6]

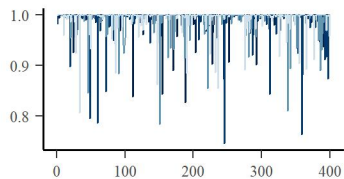

Chain

- 1
- 2
- 3
- 4

# Southern Taiwan

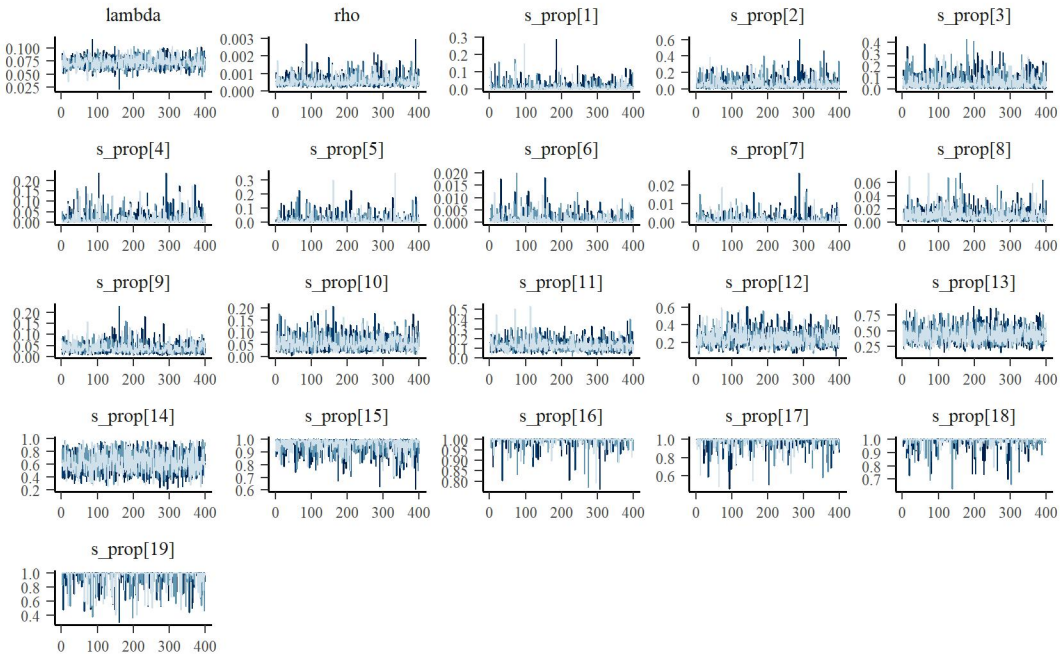

# Nation Sri Lanka

lambda

rho

s\_prop[1]

s\_prop[2]

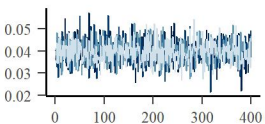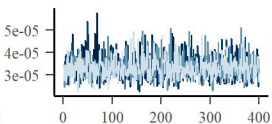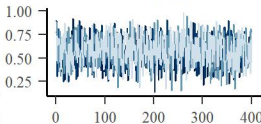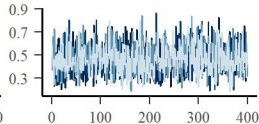

s\_prop[3]

s\_prop[4]

s\_prop[5]

s\_prop[6]

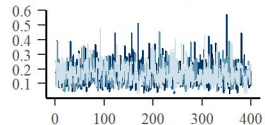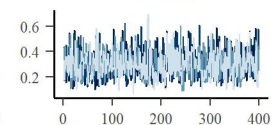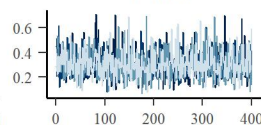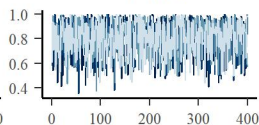

s\_prop[7]

s\_prop[8]

s\_prop[9]

s\_prop[10]

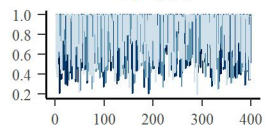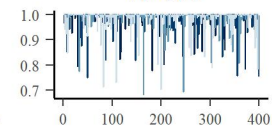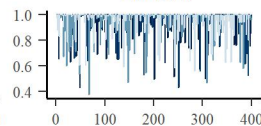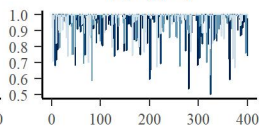

Chain

- 1
- 2
- 3
- 4

s\_prop[11]

s\_prop[12]

s\_prop[13]

s\_prop[14]

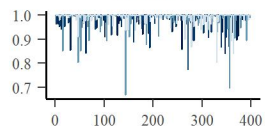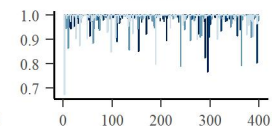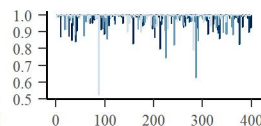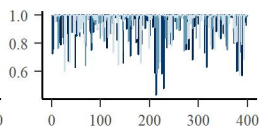

# Taipei Taiwan

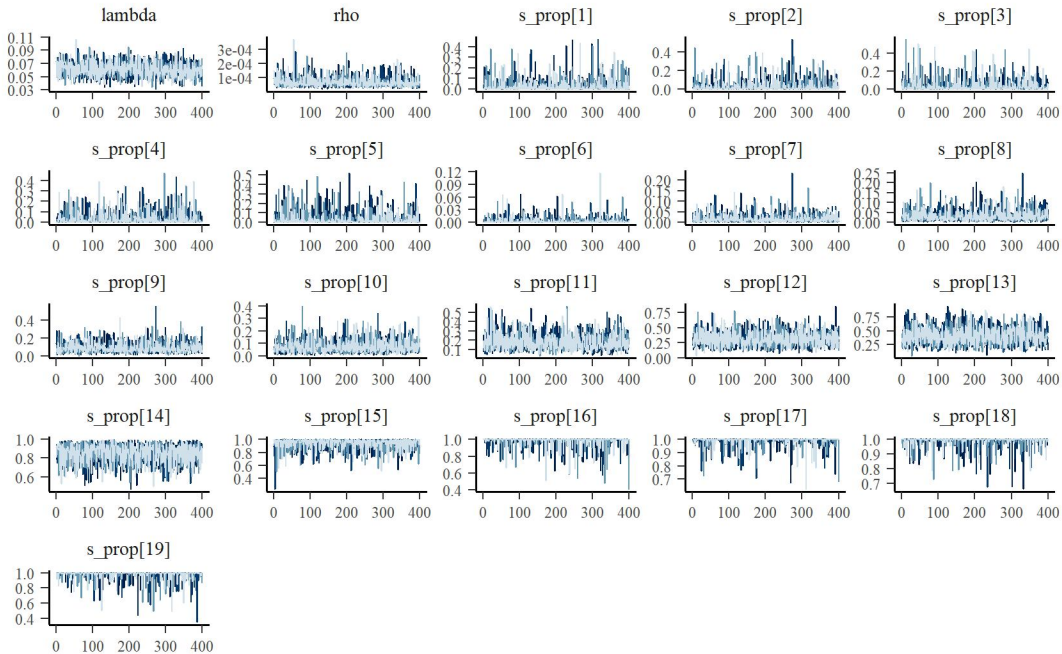



Nation  
Taiwan

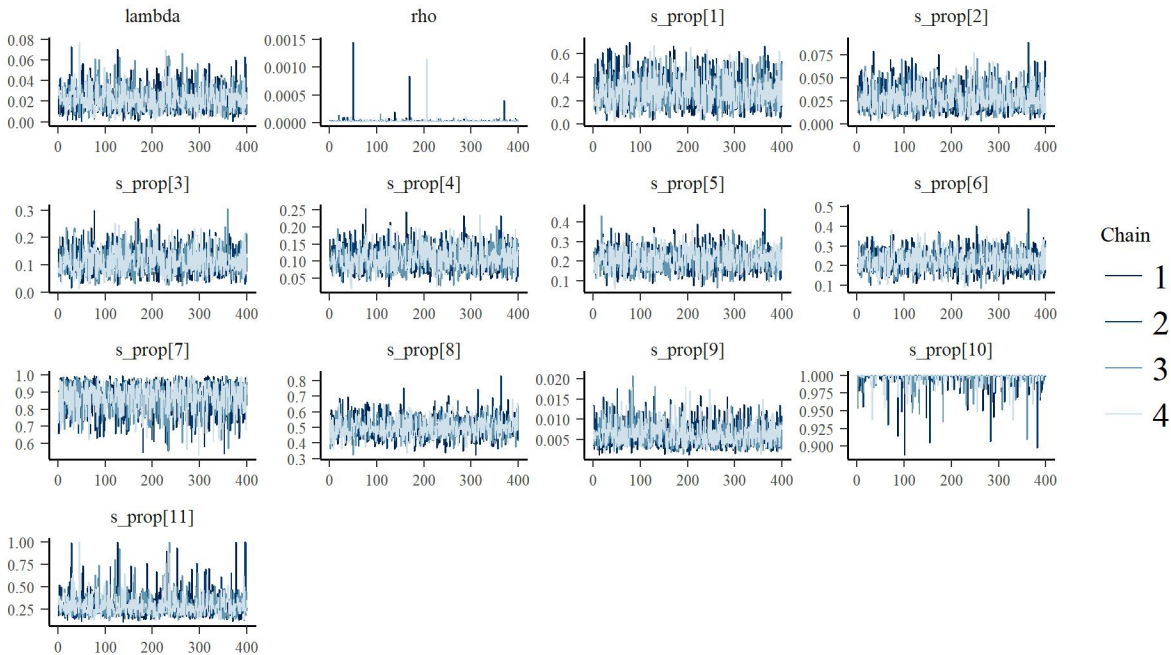

# Tamil Nadu Medium India

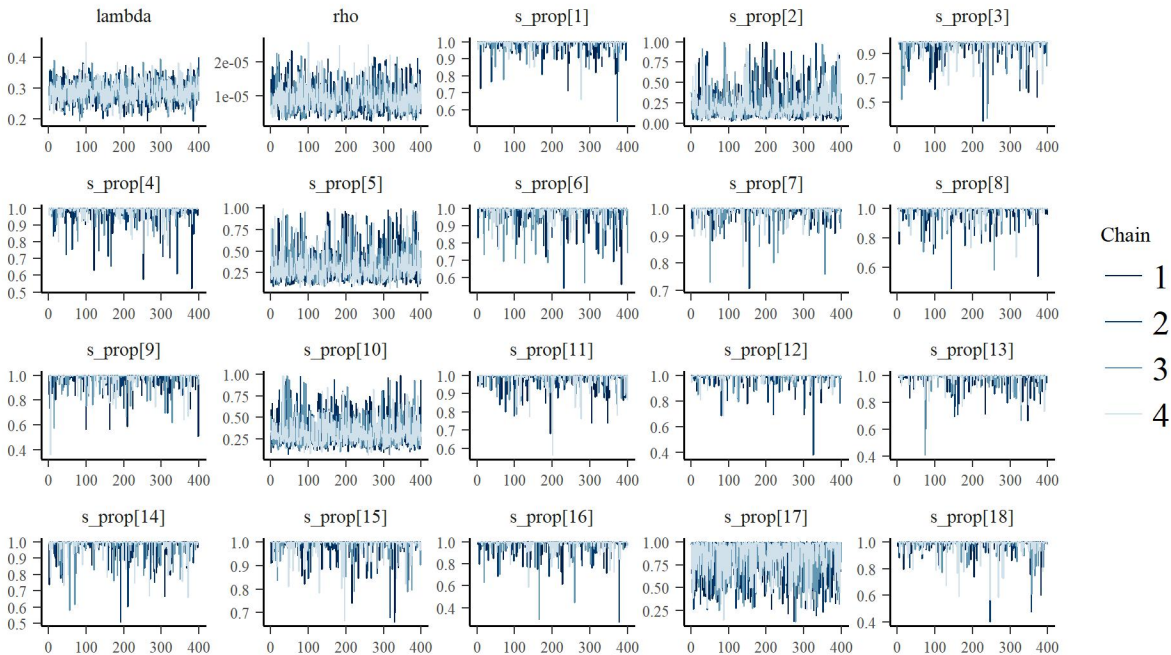

# Uttar Pradesh High India

lambda

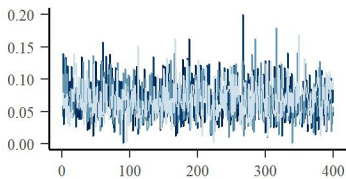

rho

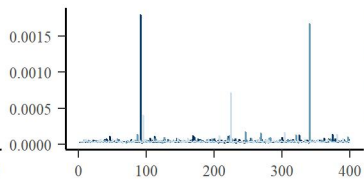

s\_prop[1]

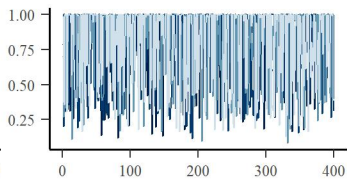

s\_prop[2]

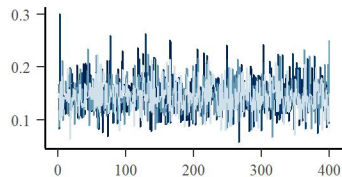

s\_prop[3]

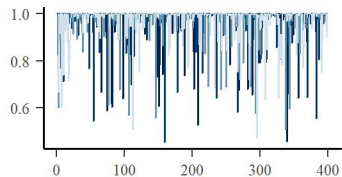

s\_prop[4]

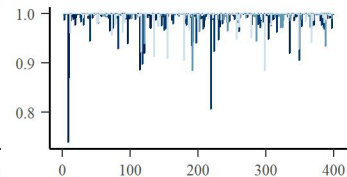

s\_prop[5]

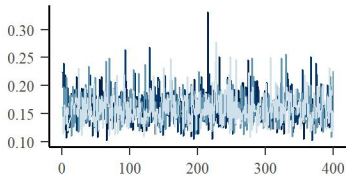

s\_prop[6]

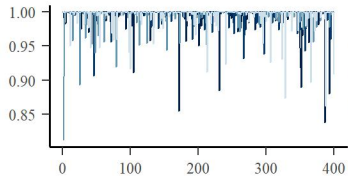

s\_prop[7]

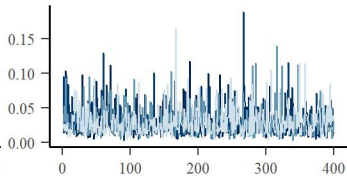

Chain

- 1
- 2
- 3
- 4

Vientiane  
Laos

lambda

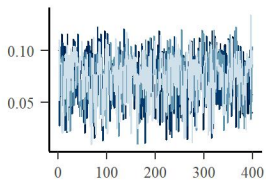

rho

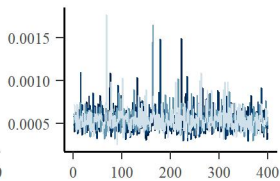

s\_prop[1]

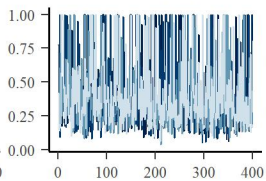

s\_prop[2]

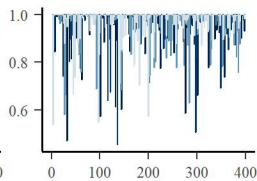

s\_prop[3]

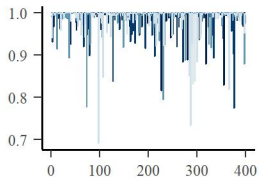

s\_prop[4]

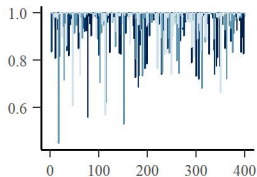

s\_prop[5]

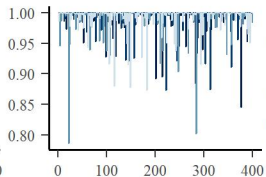

s\_prop[6]

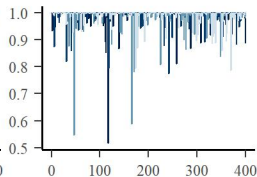

s\_prop[7]

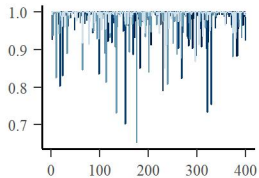

s\_prop[8]

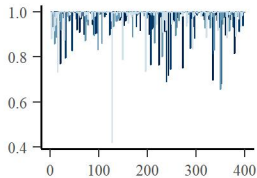

s\_prop[9]

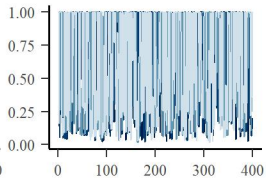

Chain

- 1
- 2
- 3
- 4

# Western Terai High Nepal

lambda

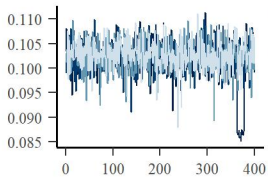

rho

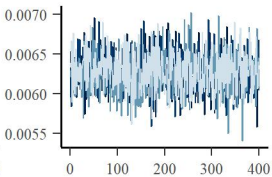

s\_prop[1]

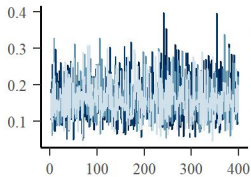

s\_prop[2]

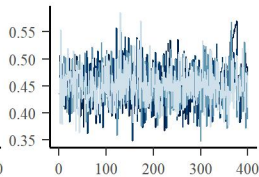

s\_prop[3]

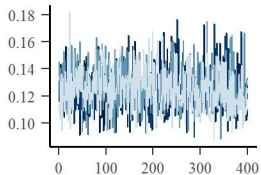

s\_prop[4]

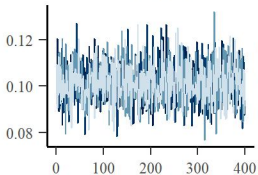

s\_prop[5]

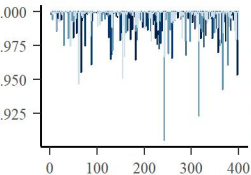

s\_prop[6]

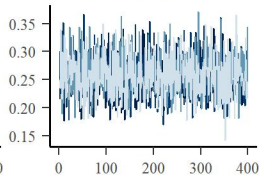

s\_prop[7]

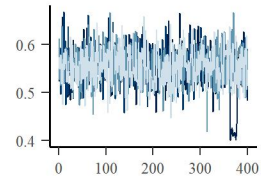

s\_prop[8]

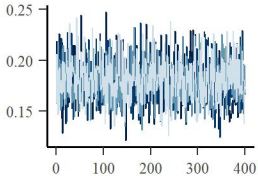

s\_prop[9]

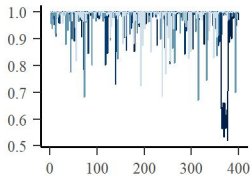

Chain

- 1
- 2
- 3
- 4

West Bengal  
Medium India

lambda

rho

s\_prop[1]

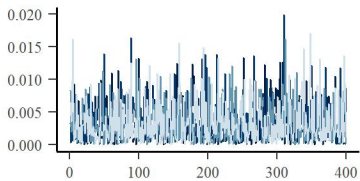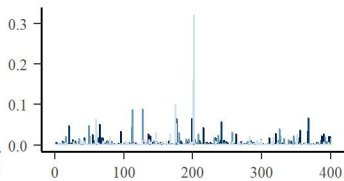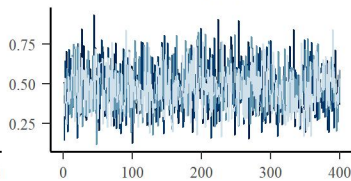

s\_prop[2]

s\_prop[3]

s\_prop[4]

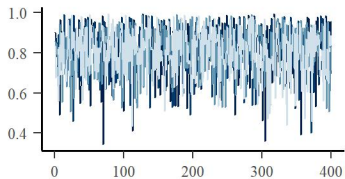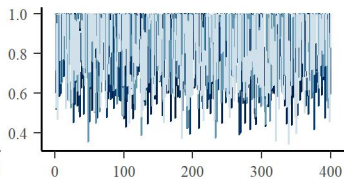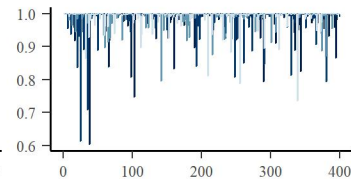

s\_prop[5]

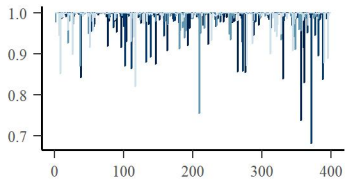

Chain

- 1
- 2
- 3
- 4
